1 **TITLE**

2 **CDPK2A and CDPK1 form a signaling module upstream of *Toxoplasma* motility**

3

4 **AUTHORS**

5 Emily Shortt<sup>a</sup>, Caroline G. Hackett<sup>a\*</sup>, Rachel V. Stadler<sup>b</sup>, Gary E. Ward<sup>b</sup>, Sebastian Lourido<sup>a,c,#</sup>

6 <sup>a</sup> Whitehead Institute, Cambridge, MA

7 <sup>b</sup> Department of Microbiology and Molecular Genetics, University of Vermont Larner College of  
8 Medicine, Burlington, VT

9 <sup>c</sup> Biology Department, MIT, Cambridge, MA

10 \* Current address: Regeneron Pharmaceuticals, Tarrytown, NY

11 # Correspondence: [lourido@wi.mit.edu](mailto:lourido@wi.mit.edu)

12

13 **RUNNING TITLE**

14 CDPK2A works with CDPK1 to regulate *T. gondii* motility

15

16 **ABSTRACT**

17 The transition between parasite replication and dissemination is regulated in apicomplexan parasites  
18 by fluctuations in cytosolic calcium concentrations, effectuated by calcium-dependent protein kinases  
19 (CDPKs). We examined the role of CDPK2A in the lytic cycle of *Toxoplasma*, analyzing its role in the  
20 regulation of cellular processes associated with parasite motility. We used chemical-genetic approaches  
21 and conditional depletion to determine that CDPK2A contributes to the initiation of parasite motility  
22 through microneme discharge. We demonstrate that the N-terminal extension of CDPK2A is necessary  
23 for the protein's function. Conditional depletion revealed an epistatic interaction between CDPK2A and  
24 CDPK1, suggesting that the two kinases work together to mediate motility in response to certain  
25 stimuli. This signaling module appears distinct from that of CDPK3 and PKG, which also controls egress.  
26 CDPK2A is revealed as an important regulator of the *Toxoplasma* kinetic phase, linked to other kinases  
27 that govern this critical transition. Our work uncovers extensive interconnectedness between the  
28 signaling pathways that govern parasite motility.

29

30 **IMPORTANCE**

31 This work uncovers interactions between various signaling pathways that govern *Toxoplasma gondii*  
32 egress. Specifically, we compare the function of three canonical calcium dependent protein kinases  
33 (CDPKs) using chemical-genetic and conditional-depletion approaches. We describe the function of a  
34 previously uncharacterized CDPK, CDPK2A, in the *Toxoplasma* lytic cycle, demonstrating it contributes  
35 to parasite fitness through regulation of microneme discharge, gliding motility, and egress from  
36 infected host cells. Comparison of analog-sensitive (AS) kinase alleles and conditionally-depleted  
37 alleles uncovered epistasis between CDPK2A and CDPK1 implying a partial functional redundancy.

38 Understanding the topology of signaling pathways underlying key events in the parasite life cycle can  
39 aid in efforts targeting parasite kinases for anti-parasitic therapies.

40

## 41 INTRODUCTION

42 Apicomplexan pathogens like *Toxoplasma gondii*, *Plasmodium* spp., and *Cryptosporidium* spp. sense and  
43 adapt to changes in the host environment throughout their life cycles. These transitions between states  
44 often require rapid cellular responses, for which calcium ions ( $\text{Ca}^{2+}$ ) are well suited as second  
45 messengers. Cells maintain low  $\text{Ca}^{2+}$  concentrations in the cytosol, in stark contrast to the extracellular  
46 milieu and the lumen of some organelles (1). Increased membrane permeability can therefore quickly  
47 change the cytosolic  $\text{Ca}^{2+}$  concentration and initiate signaling. In apicomplexans, such signaling controls  
48 progression through the lytic cycle.

49 The *Toxoplasma* lytic cycle comprises two main phases: a replicative phase during which parasites  
50 divide in a parasitophorous vacuole and a kinetic phase that includes egress from the infected host cell,  
51 gliding motility, and active invasion of a new host cell.  $\text{Ca}^{2+}$  signaling mediates the transition between  
52 the replicative and kinetic phases of the lytic cycle. After several rounds of replication, parasites actively  
53 disrupt surrounding membranes and move out of the infected cell in a process termed egress. This  
54 process can be artificially triggered through the use of  $\text{Ca}^{2+}$  ionophores like ionomycin and A23187 (2–  
55 5).  $\text{Ca}^{2+}$  fluxes can be observed with fluorescent dyes and genetically encoded reporters, which show  
56  $\text{Ca}^{2+}$  surges that precede gliding motility and invasion in *Toxoplasma* (5–7).  $\text{Ca}^{2+}$  oscillations also occur  
57 throughout the *Plasmodium* lytic cycle, with peaks in  $\text{Ca}^{2+}$  concentration preceding microneme  
58 secretion, invasion, gliding, and egress (8–11). Control of cytosolic  $\text{Ca}^{2+}$  concentrations is therefore  
59 critical for the regulation of the parasite lytic cycle.

60 Cytosolic  $\text{Ca}^{2+}$  surges originate from the release of intracellular stores or by crossing the plasma  
61 membrane (PM) from the extracellular space (12, 13). In *T. gondii*, intracellular stores include the  
62 endoplasmic reticulum (ER), acidocalcisomes, and plant-like vacuole—with the ER or a related  
63 compartment representing the most likely sources of  $\text{Ca}^{2+}$  during signaling (14). The channels  
64 responsible for  $\text{Ca}^{2+}$  release have yet to be identified in apicomplexans; however, stimulation of the  
65 cGMP signaling pathway triggers this process in *T. gondii* and *Plasmodium* spp. (7, 15–17). Treatment  
66 with the phosphodiesterase inhibitors zaprinast and BIPPO can block hydrolysis of cGMP and trigger  
67 egress (18–20) through the release of intracellular  $\text{Ca}^{2+}$  stores (7, 15–17). Protein Kinase G (PKG) is a key  
68 mediator of  $\text{Ca}^{2+}$  release, presumably through activation of phosphoinositide signaling, whereby  
69 phosphatidylinositol 4,5-bisphosphate ( $\text{PIP}_2$ ) is hydrolyzed by phosphoinositide phospholipase C (PI-  
70 PLC) into inositol triphosphate ( $\text{IP}_3$ ) and diacylglycerol (DAG). This represents a potential branch point  
71 in the signaling pathway, with  $\text{IP}_3$  triggering release of intracellular  $\text{Ca}^{2+}$  stores through an undefined  
72 channel, while DAG is converted into phosphatidic acid (PA) and independently contributes to the  
73 kinetic phase (21). Parasite motility therefore requires active cGMP and  $\text{Ca}^{2+}$  pathways, consistent with  
74 the observation that stimulation by  $\text{Ca}^{2+}$  ionophores cannot overcome the inhibition of PKG in the  
75 context of egress (19).

76 Many  $\text{Ca}^{2+}$ -mediated phenotypes can be attributed to the  $\text{Ca}^{2+}$ -dependent discharge of micronemes,  
77 which are specialized organelles that contain adhesins necessary for gliding motility (22, 23). While

78 synthetic treatments like ionophores or phosphodiesterase inhibitors can artificially raise cytosolic Ca<sup>2+</sup>  
79 concentrations and trigger microneme discharge, studies suggest that serum albumin may be a natural  
80 agonist of this process (16). The single-pass transmembrane protein MIC2 is a prototypical adhesin that  
81 has been used to monitor *T. gondii* microneme discharge. Following its release, MIC2 can be engaged  
82 by the actomyosin machinery for gliding motility (12, 24, 25). Several proteases rapidly shed the  
83 ectodomain of MIC2 from the surface of the parasite, so its presence in supernatants can be used as a  
84 measure of microneme discharge (24). The *P. falciparum* ortholog of MIC2, TRAP, is required for  
85 sporozoite motility and invasion (26), and several other adhesins are similarly released and processed in  
86 both *Toxoplasma* and *Plasmodium* (24, 27, 28). *T. gondii* micronemes additionally contain the pore-  
87 forming protein PLP1, which permeabilizes the parasitophorous vacuole membrane (PVM) and host PM  
88 during egress (29). Following membrane disruption, parasites employ gliding motility to ultimately  
89 escape from the ruptured vacuole (25, 30). Perforin-like proteins are also required for egress of *P.*  
90 *falciparum* and *P. berghei* merozoites and gametocytes (31–33). Although the repertoire of microneme  
91 proteins differs between species, the Ca<sup>2+</sup>-dependent discharge and participation in gliding motility  
92 appear conserved across the phylum (34–36).

93 Ca<sup>2+</sup> regulates several cellular processes besides microneme discharge, as evidenced by the wide array  
94 of proteins that respond directly to Ca<sup>2+</sup> concentrations through changes in conformation, stability,  
95 localization, or interactions (14). Specialized domains, such as EF hands and C2 domains, endow  
96 proteins with the ability to alter their conformation in response to Ca<sup>2+</sup> binding. Apicomplexans encode  
97 several EF hand-containing proteins including calmodulins (CaMs), calcineurin B, and calcium-  
98 dependent protein kinases (CDPKs). CDPKs are critical components of the Ca<sup>2+</sup> signaling network due  
99 to their ability to directly respond to Ca<sup>2+</sup> and phosphorylate other proteins. Although initially identified  
100 in plants, CDPKs were later found in ciliates and apicomplexans (14). Despite their similarity to  
101 Ca<sup>2+</sup>/CaM-dependent protein kinases, CDPKs are absent from mammals (37). Canonical CDPKs have  
102 four C-terminal calmodulin-like EF hands acting as the calcium-binding domain, linked by an  
103 autoinhibitory domain to the kinase domain (37, 38). CDPKs in plants control responses to a broad array  
104 of stresses, extent of starch accumulation, cell morphology, and viability. Plant CDPKs are expressed  
105 across a variety of tissue types and with various subcellular localizations (38). CDPKs exhibit a wide  
106 range of affinities for Ca<sup>2+</sup>. For example, soybean CDPK $\alpha$  is activated by ten times lower Ca<sup>2+</sup>  
107 concentrations than CDPK $\gamma$  (39, 40). Different CDPKs may therefore be tuned to respond to Ca<sup>2+</sup> spikes  
108 of varying magnitudes leading to variable downstream effects that may be further refined by  
109 subcellular localization. The array of apicomplexan CDPKs may analogously contribute to the  
110 magnitude and compartmentalization of Ca<sup>2+</sup> responses.

111 CDPKs are overrepresented in apicomplexan genomes. There are six canonical CDPKs in *T. gondii*,  
112 which can be further categorized by having short or long N-terminal extensions (37). Myristoylation  
113 sites cap the short extensions of CDPK1 and CDPK3, with an additional palmitoylation site localizing  
114 CDPK3 to the parasite PM (19, 41). By contrast, the purpose of the N-terminal extensions remains  
115 unknown. A further nine CDPKs in *T. gondii* display non-canonical configurations, with varying numbers  
116 and arrangements of EF hands and additional domains (37, 42). The function of most non-canonical  
117 CDPKs remains obscure in *T. gondii* (42), with the exception of CDPK7, which has been implicated in  
118 parasite cell division and is critical for phospholipid synthesis and vesicular trafficking (43, 44). By

119 contrast, several canonical CDPKs are required for specific life cycle stages in apicomplexans. In  
120 *Plasmodium* spp., several CDPKs regulate specific steps of sexual differentiation (45, 46). CDPKs are  
121 also important for kinetic-phase phenotypes in *Toxoplasma* and *Plasmodium*, including microneme  
122 discharge, gliding motility, invasion, and egress. TgCDPK1 and TgCDPK3 control *Toxoplasma* egress  
123 downstream of PKG (19, 41, 47), analogously to PfCDPK5 in *Plasmodium* (10, 48). In *Toxoplasma*, CDPK1  
124 is required for invasion as well as egress (19, 47), potentially due to its regulation of microneme  
125 secretion under a broader array of conditions than CDPK3. Altogether, CDPKs have been revealed as  
126 essential components of the Ca<sup>2+</sup> signaling network, although the functions of many individual kinases  
127 remain unexplored.

128 In reviewing the results of a genome-wide essentiality screen, most canonical CDPKs were dispensable  
129 in tachyzoites; however, CDPK2A remained uncharacterized despite its impact on parasite fitness (49).  
130 We sought to characterize the function of CDPK2A within the lytic cycle, comparing its role to that of  
131 CDPK1 and CDPK3, two previously-described regulators of the kinetic phase. By turning to a  
132 combination of chemical and genetic manipulations we uncover significant interconnectedness  
133 between the relevant pathways. Our efforts start to discern the contribution of the various components  
134 to the cellular pathways that control microneme discharge, motility, and egress.

135

## 136 RESULTS

### 137 Chemical-genetic analysis of CDPK2A demonstrates it is involved in parasite egress

138 To identify the CDPKs that are necessary during the parasite lytic cycle, we examined the results of a  
139 genome-wide knockout screen that measured the relative contribution of each gene to fitness as  
140 parasites replicated in human fibroblasts (49). Most canonical CDPKs were dispensable in this analysis,  
141 including the previously-studied CDPK3; however, CDPK1 and CDPK2A were fitness-conferring,  
142 indicated by phenotype scores of -3.3 and -2.05, respectively (Fig. 1A). Of these potentially-essential  
143 CDPKs, the function of CDPK2A has not been previously examined. Studies of CDPK1 and CDPK3 used  
144 analog-sensitive kinase alleles, in which the gatekeeper residue of the ATP-binding pocket of the kinase  
145 of interest is mutated to Gly, yielding a binding pocket that accommodates bulky ATP-analog inhibitors  
146 (also known as bumped kinase inhibitors), such as 3-MB-PP1 (Fig. 1B) (50–52). CDPK1 has a naturally-  
147 occurring Gly gatekeeper and can be rendered resistant to 3-MB-PP1 inhibition through mutation of the  
148 gatekeeper residue to Met—the same residue that renders CDPK3 and CDPK2A naturally resistant to  
149 the inhibitor (50, 51). Comparison of analog-sensitive and insensitive alleles can be used to isolate the  
150 effect of inhibiting the kinase in question. Using this approach, CDPK1 was shown to control parasites'  
151 ability to perform gliding motility, invade, and egress from host cells (47). By contrast, compound-  
152 mediated inhibition of CDPK3 was used to determine its contribution to motility and egress in response  
153 to specific agonists, but not invasion (19), corroborating genetic studies (41, 53).

154 Given the apparent fitness contribution of CDPK2A, we sought to examine its role in the *Toxoplasma*  
155 lytic cycle through the use of analog-sensitive alleles. In a strain harboring a 3-MB-PP1-resistant, myc-  
156 tagged CDPK1 allele (CDPK1<sup>M</sup>) (19), we modified the CDPK2A locus to introduce a C-terminal Ty  
157 epitope tag and either a Met or Gly gatekeeper residue (Fig. 1C). The Met modification (CDPK2A<sup>M</sup>)  
158 retains the natural resistance of CDPK2A to 3-MB-PP1, whereas the Gly modification (CDPK2A<sup>G</sup>)

159 renders the kinase 3-MB-PP1-sensitive. We confirmed the presence of the mutated gatekeeper residues  
160 by allele-specific PCR (**Fig. S1A**) and the expression of the Ty-tagged CDPK2A alleles by immunoblot  
161 (**Fig. 1D**). Construction of the isogenic strains carrying alleles of CDPK2A with different susceptibilities  
162 to bumped kinase inhibitors allowed us to examine the effect of kinase inhibition on various steps  
163 within the lytic cycle.

164 Parasites can be stimulated to egress from host cells by treating cultures with the calcium ionophore  
165 A23187(2) or phosphodiesterase inhibitors such as zaprinast (19) or BIPPO (18). Different agonists have  
166 been used to identify pathway-specific requirements for certain kinases (19, 54). Egress leads to loss of  
167 host-cell integrity, which can be assayed quantitatively and kinetically as the incorporation of the  
168 fluorescent dye 4',6-diamidino-2-phenylindole (DAPI) into the nuclei of permeabilized cells (55). We  
169 compared the impact of inhibiting CDPK1, CDPK3, or CDPK2A on A23187-stimulated egress. All three  
170 kinases appeared to be required for egress under these conditions. Inhibition of either CDPK1<sup>G</sup> or  
171 CDPK3<sup>G</sup> strains reduced egress by 66% and 84% compared to vehicle treatment, in agreement with  
172 previous findings (19, 41, 47, 53). Analogously, inhibition of CDPK2A<sup>G</sup> decreased egress by 61%  
173 compared to vehicle treatment (**Fig. 1E–F**). Importantly, parasites expressing the resistant allele  
174 (CDPK2A<sup>M</sup>) egressed normally in the presence of 3-MB-PP1. To compare the rates of egress, we  
175 determined the time required for each strain to achieve half of the maximum egress observed for the  
176 respective vehicle-treated control ( $T_{\text{half-max}}$ ). Inhibition of all three kinases prevented parasites from  
177 reaching half of the maximum egress during the 10-minute observation period (denoted as  $T_{\text{half-max}} >$   
178 600 s; **Fig. S1B**). To ensure that the effects observed were the result of differences in egress and not  
179 multiplicity of infection, we verified that monolayers had equivalent numbers of parasite vacuoles (**Fig.**  
180 **S1C**). Taken together, these results suggest that CDPK2A contributes to egress, along with CDPK1 and  
181 CDPK3.

182 We next assessed the contribution of CDPK2A to parasite egress after treatment with the  
183 phosphodiesterase inhibitor zaprinast. Inhibition of CDPK2A or CDPK1 caused a significant reduction in  
184 egress (**Fig. 1G–H**). By contrast, CDPK3 inhibition simply delayed egress ( $T_{\text{half-max}}$  of 257 s versus 117 s for  
185 vehicle-treated parasites), with parasites eventually reaching levels of egress equivalent to CDPK3<sup>M</sup>  
186 (**Fig. 1G–H, Fig. S1D**). These differences were attributable to egress because similar numbers of  
187 vacuoles were present in all samples (**Fig. S1E**). The findings are consistent with previous work  
188 suggesting that PKG activation, through inhibition of the cGMP-degrading phosphodiesterases, can  
189 compensate for inhibition of CDPK3 (19, 54).

## 190 **The N-terminal extension of CDPK2A impacts its localization and function**

191 CDPK2A has a long N-terminal extension, which is absent from CDPK1 and CDPK3 (37). We examined  
192 whether the N-terminal extension is required for CDPK2A function. Attempts to amplify the 5' end of  
193 *CDPK2A* from cDNA yielded two isoforms, which were used to clone two complementation constructs  
194 expressed under the heterologous *SAG1* promoter. Complement 1 (c.1) and complement 2 (c.2) differ in  
195 how much of the N-terminal extension they include due to alternative splicing; however, both  
196 constructs contain the entire kinase domain (**Fig. 2A**). We also generated complement 3 (c.3), which  
197 included 1.5 kb of sequence upstream of the predicted translational start site, as well as the first intron,  
198 enabling both isoforms to be expressed under endogenous regulation. Complementation alleles had Met



199 gatekeepers and C-terminal HA tags and were expressed in trans in CDPK2A<sup>G</sup> parasites (**Fig. 2A, Fig.**  
200 **S2A**). This strategy enables inhibition of the endogenous CDPK2A<sup>G</sup> to assess the functionality of the  
201 second copy. The selected clones ---exhibited comparable levels of CDPK2A<sup>M</sup> expression (**Fig. 2B**). We  
202 found that endogenously-tagged CDPK2A (Ty) localizes to the periphery of intracellular parasites,  
203 possibly to the inner membrane complex or PM (**Fig. 2C**). Out of the three complementing vectors, only  
204 c.3, which retained the endogenous 5' end of the *CDPK2A* mRNA, localized to the parasite periphery,  
205 similarly to the endogenous copy. By contrast, c.1 and c.2 localized to the parasite cytosol (**Fig. 2C**).  
206 This suggested that localization to the parasite periphery is dependent on the endogenous 5' end of  
207 the gene, though not necessarily the presence of the N-terminal extension, perhaps due to a cryptic  
208 alternative start site or the precise timing of expression.

209 We next assessed the function of the complementing alleles. We inhibited the endogenous CDPK2A<sup>G</sup>  
210 allele and assessed whether each of the complemented strains could egress following A23187 or  
211 zaprinast induction. With A23187 stimulation, c.1 and c.3 strains egressed normally despite inhibition of  
212 the endogenous allele; however, inhibitor-treated c.2 parasites exhibited no complementation (**Fig.**  
213 **2D–E**). The two alleles that did complement (c.1 and c.3) had egress kinetics comparable to 3-MB-PP1–  
214 resistant CDPK2A<sup>M</sup> parasites, reaching half the maximal egress around 200 s (**Fig. S2B**). We confirmed  
215 that in all cases the monolayers were equivalently infected (**Fig. S2C**). Complementation during  
216 zaprinast-induced egress was intermediate but followed similar trends, with nearly-wild-type responses  
217 for c.3, an intermediate response for c.1, and no apparent complementation by c.2 (**Fig. 2F–G**). This  
218 partial rescue was also reflected in the rates of egress (**Fig. S2D–E**). These findings suggest that the N-  
219 terminal extension of CDPK2A—present in c.1 and c.3 constructs, but absent in c.2—is required for  
220 parasite egress. The functional complementation contrasts with the localization of the proteins  
221 encoded by these alleles, where only c.1 matched the peripheral localization of protein encoded by the  
222 endogenous allele.

### 223 **Conditional depletion of CDPK2A only partially mimics chemical inhibition**

224 Off-target effects of 3-MB-PP1 interfere with the chemical-genetic approach described above during  
225 long-term culture, making it challenging to assess the impact of kinase inhibition over several lytic  
226 cycles (56). Auxin-inducible degradation of target proteins has been adapted to *Toxoplasma* and used to  
227 investigate protein kinases and associated signaling pathways (57, 58). We employed this conditional-  
228 depletion system as an orthogonal strategy to assess CDPK function. Briefly, a protein of interest is  
229 tagged with an auxin-inducible degron (AID) in a strain expressing TIR1. When transgenic parasites are  
230 treated with the plant hormone auxin—most commonly 3-indoleacetic acid (IAA)—the tagged protein is  
231 ubiquitinated and targeted by the proteasome for degradation (59) (**Fig. 3A**). Protein depletion occurs  
232 within minutes to hours in *Toxoplasma*, depending on the protein of interest (57, 58). We generated a  
233 panel of strains in which CDPK1, CDPK3, or CDPK2A were tagged at their C termini with the Ty epitope  
234 followed by mNeonGreen and a minimal auxin-inducible degron (mAID; **Fig. S3A**). Localization of  
235 CDPK2A-AID was consistent with the chemical-genetic alleles, with mNeonGreen signal observed at  
236 the parasite periphery (**Fig. 3B**). Expression of all mNeonGreen-tagged alleles was measured by FACS  
237 in parasites with and without IAA treatment. Three hours of IAA treatment was sufficient to observe  
238 robust and uniform depletion of each CDPK (**Fig. 3C**). Based on these results, we treated the parasites

239 with auxin for a minimum of 3 h for downstream analyses, achieving kinase degradation within less  
240 than a single cell cycle.

241 We assessed egress following acute depletion of CDPK1, CDPK3, or CDPK2A. Stimulation with A23187  
242 induced minimal egress in CDPK-depleted parasites, indicating that all three kinases are necessary for  
243 egress under these conditions (**Fig. 3D–E**); this is consistent with our chemical-genetic approach.  
244 Analysis of egress kinetics showed that all three depleted lines failed to egress within the observation  
245 window, in contrast to the TIR1 parental parasites, which achieved half-maximum egress in 115 s (**Fig.**  
246 **S3B–C**).

247 We next assessed the ability of CDPK-depleted parasites to egress in response to zaprinast stimulation.  
248 Depletion of CDPK1 or CDPK3 phenocopied their chemical-genetic inhibition. CDPK1-depleted  
249 parasites were unable to egress, whereas CDPK3-depleted parasites displayed delayed but near-  
250 complete egress (**Fig. 3F–G**), achieving half-maximum egress at 260 s compared to 120 s for the  
251 parental TIR1 strain (**Fig. S3D**). Surprisingly, CDPK2A-depleted parasites achieved normal levels of  
252 egress (90% of vehicle-treated parasites), albeit with a delay ( $T_{\text{half-max}}$  of 230 s), despite equivalent levels  
253 of overall infection (**Fig. 3F–G, Fig S3D–E**). We conclude that differences between the strains used for  
254 chemical inhibition or depletion render CDPK2A differentially required for egress. Such differences may  
255 result from manipulation of the *CDPK2A* locus or the strain background in which the mutants were  
256 generated.

#### 257 **Inhibition of CDPK1 reveals epistasis with CDPK2A**

258 We considered whether differences in the CDPK1 alleles of the parental lines used—CDPK1<sup>M</sup> for  
259 chemical genetics and CDPK1<sup>G</sup> for conditional depletion—could lead to the differential requirement for  
260 CDPK2A in zaprinast-stimulated egress when assessed by either approach. Enzymatic assays have  
261 demonstrated that CDPK1<sup>G</sup> is more catalytically active than CDPK1<sup>M</sup>, although either allele can support  
262 parasite replication (60). Based on the presence of CDPK1<sup>M</sup> in the analogue-sensitive (AS) kinase lines  
263 and the observed overlapping phenotypes of CDPK1 and CDPK2A, we hypothesized that partial loss of  
264 CDPK1 activity may lead to an increased reliance on CDPK2A for egress.

265 We assessed whether CDPK1 and CDPK2A exhibit epistasis by broadly examining the lytic cycle during  
266 plaque formation. We partially inhibited CDPK1 with sublethal concentrations of 3-MB-PP1 in the  
267 context of CDPK2A expression or depletion, using the CDPK2A-AID strain. CDPK2A-depleted parasites  
268 failed to form plaques when CDPK1 was partially inhibited. By contrast, plaquing was not impacted by  
269 partial inhibition of CDPK1 in the context of CDPK3 depletion (**Fig. 4A**). This suggests that the  
270 requirement for CDPK2A during the lytic cycle depends on the level of CDPK1 activity.

271 We next examined the epistatic interaction between the two kinases during zaprinast-stimulated  
272 egress using endpoint assays. Treating parasites with a range of 3-MB-PP1 concentrations to inhibit  
273 CDPK1<sup>G</sup>, we observed that CDPK2A depletion renders parasites hypersensitive to CDPK1 inhibition  
274 (**Fig. 4B, Fig. S4**). By contrast, depletion of CDPK3 did not change the sensitivity of parasites to CDPK1  
275 inhibition by 3-MB-PP1; significance was calculated using an F test for fitting all data to a single curve—  
276 CDPK2A-AID data points did not fit a single curve ( $p < 0.0001$ ), whereas TIR1 and CDPK3-AID data  
277 points, irrespective of IAA treatment, fit to one curve (ns). This observation is supported by the  
278 calculated  $EC_{50}$  for 3-MB-PP1, which decreases significantly when CDPK2A-AID parasites are treated

279 with auxin (**Fig. 4C**). The combination of chemical inhibition and protein knockdown allowed us to  
280 demonstrate that CDPK2A becomes more critical for egress when CDPK1 activity is compromised due  
281 to a mutant gatekeeper allele as in CDPK1<sup>M</sup> or chemical inhibition. We surmise that the AID-tagged  
282 lines more closely reflect physiological conditions—with a wildtype CDPK1 allele—than AS kinase lines,  
283 so we examined the function of CDPK2A across the lytic cycle using conditional depletion.

#### 284 **Conditional depletion reveals a role for CDPK2A at various stages of the lytic cycle**

285 Plaque formation captures repeated cycles of host cell lysis. As expected, depletion of CDPK1 blocked  
286 plaque formation (47), whereas CDPK3 appeared completely dispensable (41, 49, 53). Depletion of  
287 CDPK2A resulted in the formation of fewer plaques than the vehicle-treated tagged line (**Fig. 5A, Fig.**  
288 **S5A**). These results are in line with the phenotype scores in the genome-wide fitness screen (49),  
289 placing CDPK2A at an intermediate fitness contribution, between CDPK1 and CDPK3. Additionally,  
290 CDPK2A-AID parasites formed smaller plaques than the parental line, and plaque size further  
291 decreased when CDPK2A was depleted by IAA treatment (**Fig. 5B, Fig. S5B**). The observed  
292 hypomorphism between CDPK2A-AID and parental TIR1 parasites suggests that AID-tagging of the  
293 kinase may impact its function. The impact of CDPK2A depletion on plaquing efficiency may result  
294 from impaired or inefficient invasion, slower parasite replication, decreased motility of parasites during  
295 successive rounds of lysis, or a combination thereof, which must be deconvoluted through single-  
296 phenotype assays.

297 We assessed whether CDPK2A is required for parasite invasion of host cells using an  
298 immunofluorescence assay that distinguishes between invaded and extracellular parasites. Depletion  
299 of CDPK1 blocked parasite invasion; however, depletion of CDPK3 or CDPK2A did not affect parasite  
300 invasion (**Fig. 5C**), consistent with previous findings for CDPK1 and CDPK3 (19, 41, 47). The  
301 dispensability of CDPK2A for invasion was corroborated by chemical-genetics. Inhibition of analog-  
302 sensitive alleles of CDPK1 or CDPK2A with 3-MB-PP1 confirmed that CDPK1 is necessary for invasion,  
303 whereas CDPK2A is dispensable for this process (**Fig. S5C**).

304 Gliding motility precedes invasion and is a necessary aspect of parasite egress from host cells, making it  
305 critical for parasite spread (61). We quantitatively assessed the 3D motility of CDPK-depleted parasites  
306 in Matrigel, which may better capture subtle motility defects that are hard to appreciate by traditional  
307 2D motility assessment (62) (**Fig. 5D**). Depletion of CDPK1 or CDPK3 decreased the percentage of  
308 parasites moving during the assay by 58% or 44% respectively. CDPK2A-AID parasites appeared to  
309 move less than the parental TIR1 strain, although their motility was not decreased further by pre-  
310 treatment with IAA (**Fig. 5E**). We directly compared the motility of TIR1 parental and CDPK2A-AID  
311 tagged parasites without the addition of IAA, confirming that CDPK2A-AID tagging decreased parasite  
312 motility significantly (**Fig. 5F**). Track length and displacement were significantly altered by addition of  
313 IAA to CDPK1-AID parasites only, and maximum and speed mean speed were not altered by IAA  
314 treatment in any of the strains analyzed (**Fig. S5D–G**). Consistent with our observations, CDPK1 was  
315 previously implicated in parasite motility in two-dimensional analyses (19, 47). There is some ambiguity  
316 as to CDPK3's contribution to parasite motility in previous 2D analyses, depending on whether parasites  
317 were stimulated by switching from intracellular to extracellular buffer (19, 53, 63) or by treatment with  
318 A23187(41). Nevertheless, it is clear that CDPK3-mediated phosphorylation of MyoA contributes to



319 motility (63). Our results suggest that CDPK2A, along with CDPK1 and CDPK3, plays a critical role in  
320 gliding motility; however, AID tagging seems to sufficiently reduce CDPK2A activity such that no  
321 further reduction in gliding motility is observed under IAA treatment. We expect that certain  
322 phenotypes might require higher levels of kinase activity, revealing the hypomorphism of the  
323 conditional allele.

324 We further assessed the ability of CDPK2A-depleted parasites to secrete micronemal contents. We  
325 expressed *Gussia luciferase* (GLuc) fused to myc-tagged MIC2 in CDPK-AID transgenic lines in order to  
326 study microneme protein secretion following knockdown of each kinase (**Fig. 55H**). Following CDPK  
327 depletion, parasites were stimulated to secrete with fetal bovine serum (FBS) alone or supplemented  
328 with zaprinast. Excreted/secreted antigen (ESA)-containing supernatants were collected, and MIC2  
329 secretion was measured by luciferase signal. Parasites depleted of CDPK1, CDPK3, or CDPK2A secreted  
330 less MIC2 when stimulated with either FBS alone or FBS and zaprinast for 30 min (**Fig. 55G**).

331 Interestingly, CDPK2A is not required for zaprinast-stimulated microneme protein secretion at an acute  
332 5 min time point, even though CDPK1 and CDPK3 are each required (**Fig. 55I**). We further verified that  
333 basal MIC2 levels were equivalent between strains and that CDPK depletion does not impact total MIC2  
334 in parasite lysates (**Fig. 55J**). Overall, these results suggest CDPK1, CDPK3, and CDPK2A are all  
335 involved in microneme protein secretion, but to different degrees.

336

## 337 DISCUSSION

338 We examined the role of CDPK2A in the lytic cycle of *Toxoplasma*, analyzing its contribution to parasite  
339 fitness through processes related to parasitism, including microneme protein secretion, gliding  
340 motility, and egress from host cells. Using a combination of chemical-genetic and conditional depletion  
341 methods, we show that CDPK2A contributes to the initiation of parasite egress through microneme  
342 discharge and gliding motility. We further demonstrated that the N-terminal extension of CDPK2A is  
343 necessary for the protein's function in egress. Contrasting results from chemical inhibition and  
344 conditional depletion studies revealed an epistatic interaction between CDPK2A and CDPK1. Our  
345 results suggest that CDPK2A and CDPK1 work together to mediate egress following the stimulation of  
346 the PKG pathway (**Fig. 55H**). This signaling module might be differentially compartmentalized from  
347 CDPK3 and PKG, which localize to the PM. Our work uncovered additional complexity and  
348 interconnectedness in the signaling pathways that govern key events during the parasite lytic cycle.

349 CDPK2A contributes to parasite fitness. Plaque assays showed limited growth for parasites depleted of  
350 CDPK2A—an intermediate effect between the dispensable CDPK3 and the essential CDPK1. These  
351 observations are consistent with previous genome-wide loss-of-function screens, which had calculated  
352 an intermediate phenotype for CDPK2A, between CDPK1 and CDPK3(49). We have sought to  
353 determine what differentiates the fitness-conferring CDPK1 and CDPK2A from the dispensable CDPK3.  
354 Chemical-genetic approaches previously showed that accumulation of cGMP, which activates PKG, can  
355 compensate for loss of CDPK3 during egress (19). The reliance on CDPK2A similarly appeared to be  
356 conditional on the activity of other kinases. While all three CDPKs were required for egress in response  
357 to calcium ionophores, as with CDPK3, conditional depletion of CDPK2A could be partially  
358 compensated through hyperstimulation of the PKG pathway; however, in the case of CDPK2A,  
359 compensation depended on the level of CDPK1 activity.

360 Epistasis appears pervasive among the pathways regulated by CDPKs. As mentioned above, activation  
361 of PKG through the application of phosphodiesterase inhibitors (e.g., zaprinast) enables parasite egress  
362 despite CDPK<sub>3</sub> inhibition or loss (19, 54). Epistasis between PKG and CDPKs has also been observed in  
363 *Plasmodium* spp. at various stages of the intraerythrocytic cycle (15, 64, 65). Genetic interaction  
364 between PbCDPK<sub>4</sub> (the ortholog of TgCDPK<sub>1</sub>) and PKG was revealed by a *P. berghei* screen (15).  
365 Analogously to our chemical-genetic results, PbCDPK<sub>4</sub> becomes critical for parasite invasion and  
366 motility in a genetic background expressing a variant of PKG in which the gatekeeper residue has been  
367 mutated (PKG<sup>T619Q</sup>) (15). It is inferred from phenotypes associated with PKG activity that the PKG<sup>T619Q</sup>  
368 mutant is less active than wildtype. As with the TgCDPK<sub>1</sub><sup>G128M</sup> allele used in our chemical-genetic  
369 approach, these mutants retain sufficient kinase activity to sustain parasite viability, yet the mutation  
370 clearly places a strain on other aspects of the signaling network. Such interactions likely extend further  
371 into the network, since double knockouts of PbCDPK<sub>1</sub> and PbCDPK<sub>4</sub> are viable but cannot be  
372 generated in parasites expressing PKG<sup>T619Q</sup> (15). The interconnectivity of CDPK networks may render  
373 them more plastic. Indeed, studies in *P. falciparum* suggest that parasites rapidly adapt to the loss of  
374 PfCDPK<sub>1</sub> activity, perhaps through upregulation of other CDPKs (65, 66).

375 The plasticity of the signaling networks controlling egress can be manipulated through  
376 pharmacological stimuli that obscure or exaggerate the function of individual pathway components,  
377 revealing novel connectivity or dependencies. As described above, hyperactivation of the PKG pathway  
378 overcomes inhibition of CDPK<sub>2A</sub> or CDPK<sub>3</sub>. Analogously, *P. falciparum* parasites deficient in CDPK<sub>5</sub> fail  
379 to egress, but this block can be overcome by hyperactivation of PKG (10, 48)). The degree of pathway  
380 overstimulation, whether through ionophore or phosphodiesterase inhibitor treatment, influences the  
381 interpretation of the results—particularly since the natural levels or dynamics of these second  
382 messengers are rarely known. Hyperactivation of a pathway may also force interactions that would  
383 otherwise not occur at the basal state (67). With this context, we can consider that epistatic interactions  
384 may result from shared substrates or the redundancy of independent pathways. PKG has been shown  
385 to be a calcium regulator in *T. gondii* and *Plasmodium* spp. (7, 15–17, 68), placing it upstream of CDPK  
386 activation. In plants, CDPKs are tuned to respond to different calcium concentrations (38), raising the  
387 possibility that dependency on different parasite CDPKs may result from the magnitude of the calcium  
388 surge elicited by PKG. Nevertheless, the subcellular sorting of epistatic interactions—with CDPK<sub>3</sub> and  
389 PKG strictly localized to the PM—argues for potential overlap in their substrates as the mechanism  
390 underlying their epistasis.

391 Our studies also reflect some of the challenges inherent in studying protein kinases and interconnected  
392 signaling networks. While the goal is often to infer the role of a kinase in its native state, genetic  
393 perturbations may result in compensatory changes that obscure its function. While AID knockdown of  
394 CDPK<sub>1</sub> and CDPK<sub>3</sub> phenocopied chemical-genetic findings for egress, CDPK<sub>2A</sub> knockdown did not.  
395 Surprisingly, the discrepancy between chemical inhibition and AID depletion of CDPK<sub>2A</sub> could be  
396 attributed to the difference in CDPK<sub>1</sub> alleles between the two systems, since partial inhibition of CDPK<sub>1</sub>  
397 results in a stronger requirement for CDPK<sub>2A</sub> in zaprinast-stimulated egress. This is consistent with  
398 biochemical studies that had revealed reduced ATP affinity of TgCDPK<sub>1</sub><sup>G128M</sup> relative to the wildtype  
399 enzyme (60). Analogously, phenotypic assays such as 3D gliding motility and plaque size argue for  
400 hypomorphism of the CDPK<sub>2A</sub>-AID allele. Inspection of CDPK<sub>2A</sub>-AID parasites' motility tracks

401 suggested they may move along less-tightly-wound (or lower amplitude) corkscrews compared to  
402 other strains. An altered geometry of movement may be less efficient, resulting in the smaller plaque  
403 areas observed for CDPK2A-AID parasites. Taken together, these results argue for caution in the  
404 interpretation of perturbed signaling systems; nevertheless, comparison of multiple approaches can be  
405 used to infer the native function of protein kinases like CDPK2A.

406 Several signaling pathways converge on the regulation of microneme discharge, including those  
407 controlled by CDPK2A. Microneme discharge lies upstream of parasite egress, gliding motility, and  
408 invasion through the release of diverse proteins, including perforins that disrupt the PVM (29) and  
409 adhesins that mediate substrate attachment (69, 70). Depletion of any of the studied CDPKs resulted in  
410 a decrease in microneme discharge. The effect of CDPK2A depletion was only evident following  
411 prolonged periods of microneme discharge (30 min). By contrast, the effect of CDPK1 and CDPK3 was  
412 already evident within 5 min of stimulation. This may suggest a model in which some CDPKs regulate  
413 an initial wave of secretion, while others regulate the sustained response. Previous studies of CDPK3-  
414 knockout parasites reported normal MIC2 secretion for extracellular parasites stimulated with A23187  
415 or ethanol (41), although intracellular parasites clearly depend on CDPK3 to permeabilize the  
416 parasitophorous vacuole upon A23187 treatment (19, 41). Differences in the sensitivity or conditions of  
417 our assays (e.g., the use of intracellular buffer in our microneme discharge assays) may have focused  
418 our assays on the responses that govern egress. Previous work also reported that the contributions of  
419 CDPK1 and CDPK3 to microneme discharge depended on the agonist used (19). Consistent with these  
420 observations and the epistatic interactions discussed above, CDPK2A may impact microneme secretion  
421 to different extents across the lytic cycle depending on the stimuli experienced by parasites.

422 We demonstrated that the N-terminal extension of CDPK2A is necessary for its function.  
423 Complementing constructs that expressed a full-length version of CDPK2A were able to egress when  
424 the endogenous kinase was inhibited. The N terminus may contain localization determinants that drive  
425 CDPK2A to the parasite periphery, although the predicted gene model lacks consensus motifs for  
426 myristoylation or palmitoylation that participate in the localization of CDPK3 to the PM (19, 41).  
427 CDPK2A was also not detected in mass spectrometry datasets enriching for myristoylated (71) or  
428 palmitoylated (72) proteins. Proteomic studies have detected CDPK2A peptides spanning the coding  
429 sequence of exon 2 (exon 1 in c.1), further suggesting that the truncated c.2 sequence generated from  
430 cDNA is not the prominent species in wild-type parasites (71). Only the complementing construct driven  
431 by the endogenous 5' UTR and promoter yielded a protein that co-localized with the endogenous  
432 CDPK2A, suggesting localization to the parasite periphery depends on endogenous regulatory signals  
433 rather than the N terminus of the protein. We cannot exclude that an alternative translation start site is  
434 used, giving rise to dually-localized species. Methionine 59 in the longer gene model may be the true  
435 start site, matching the predicted coding sequence in *Hammondia hammondi* (73). The existing data  
436 suggest that localization to the parasite periphery is not strictly required for CDPK2A's function, in  
437 contrast to CDPK3, which must be peripherally-localized via myristoylation and palmitoylation in order  
438 for parasites to egress (19, 41). CDPK orthologs containing N-terminal extensions appear not to  
439 universally localize to any given compartment. PfCDPK5, which controls egress, associates with  
440 parasite membranes, possibly including the cytosolic-facing side of micronemes (10, 48), while  
441 PfCDPK3, required for ookinete motility, is cytoplasmic (11, 74). There is also precedent for signaling-

442 related proteins to express multiple functionally distinct isoforms, often arising from alternative  
443 translational initiation. For example, in *E. tenella* and *T. gondii*, one isoform of PKG is N-acylated and  
444 localizes to the PM, while the other isoform is cytoplasmic. Interestingly, either isoform can function if  
445 targeted to the PM (58, 75). Isoform diversity may further drive the plasticity of CDPK signaling  
446 networks, although this has not been formally addressed by our work.

447 The use of both chemical inhibition and conditional depletion to study CDPK2A function uncovered  
448 additional complexity and interconnectedness in the signaling pathways that govern the lytic cycle. We  
449 observe that CDPK1, CDPK3, and CDPK2A are all involved to varying degrees in microneme discharge,  
450 with functional consequences during egress, gliding motility, and invasion. We also further describe  
451 functional redundancy that structures the pathway into two signaling modules that are jointly required  
452 during parasite egress. CDPK1 and PKG play dominant roles in their respective modules, with CDPK2A  
453 and CDPK3 contributing less-essential functions. These supportive activities may be nonetheless  
454 important for parasite fitness under particular conditions. Additionally, these functional modules seem  
455 to be spatially distinct, with CDPK1/CDPK2A signaling occurring in the parasite cytoplasm, while  
456 CDPK3/PKG signaling occurs at the parasite PM (68). Understanding the topology of signaling  
457 pathways underlying key events in the parasite life cycle can help identify compensatory changes and  
458 predict phenotypic plasticity as we contemplate targeting parasite kinases for anti-parasitic therapies.

459

## 460 **MATERIALS & METHODS**

### 461 **Parasite and host cell culture**

462 *T. gondii* parasites were grown in human foreskin fibroblasts (HFFs) maintained in DMEM (GIBCO)  
463 supplemented with 3% heat-inactivated newborn calf serum (Millipore Sigma), 2mM L-glutamine  
464 (Thermo Fisher Scientific), and 10 µg/mL gentamicin (Thermo Fisher Scientific). Where noted, DMEM  
465 supplemented with 10% heat-inactivated fetal bovine serum (FBS, Millipore Sigma), 2mM L-glutamine  
466 (Thermo Fisher Scientific), and 10 µg/mL gentamicin was used. HFFs and *T. gondii* lines were monitored  
467 regularly and maintained as mycoplasma-free.

### 468 **Parasite transfection**

469 Parasites were passed through 3 µm filters, pelleted at 1000 × *g* for 10 min, washed, resuspended in  
470 Cytomix (10 mM KPO<sub>4</sub>, 120 mM KCl, 150 mM CaCl<sub>2</sub>, 5 mM MgCl<sub>2</sub>, 25 mM HEPES, 2 mM EDTA, 2  
471 mM ATP, and 5 mM glutathione), and combined with DNA to a final volume of 400 µL.  
472 Electroporation used an ECM 830 Square Wave electroporator (BTX) in 4 mm cuvettes with the  
473 following settings: 1.7 kV, 2 pulses, 176 µs pulse length, and 100 ms interval.

### 474 **Strain generation**

475 Oligos were ordered from IDT. Primers, plasmids, and parasite strains used or generated in this study  
476 can be found in **Supplementary Table 1**. Descriptions of strain generation and plasmid construction, or  
477 relevant accession numbers, are also provided in the table.

### 478 **cDNA generation**

479 Total RNA was extracted from *RH* parasites using Trizol. cDNA was generated according to package  
480 instructions for SMARTer PCR cDNA synthesis kit (Clontech/TakaraBio).

### 481 **Genomic DNA extraction**

482 Extracellular parasites were pelleted at  $1000 \times g$  for 10 min and resuspended in phosphate buffered  
483 saline supplemented with Proteinase K (10  $\mu\text{g}/\text{mL}$ ). Suspensions were incubated at  $37^\circ\text{C}$  for 1 h,  $50^\circ\text{C}$  for 2  
484 h,  $95^\circ\text{C}$  for 15 min to extract genomic DNA.

#### 485 Immunoblotting

486 Parasite pellets were lysed in xenopus buffer (50 mM KCl, 20 mM HEPES, 2 mM  $\text{MgCl}_2$ , 0.1 mM EDTA  
487 pH 7.5) supplemented with 1% TritonX-100, HALT protease inhibitor cocktail (ThermoFisher), and 10  
488  $\mu\text{g}/\text{mL}$  DNaseI (Sigma Aldrich) at room temperature for 1 hour with rotation. Lysates were combined  
489 with Laemmli buffer (for final concentration 2% SDS, 20% glycerol, 60 mM Tris HCl pH 6.8, 0.01%  
490 bromophenol blue) and 2-mercaptoethanol (1% final concentration) and boiled 10 min. Samples were  
491 run on a 7.5% SDS-PAGE gel (BioRad), transferred onto a nitrocellulose membrane in transfer buffer (25  
492 mM TrisHCl, 192 mM glycine, 0.1% SDS, 20% methanol). Blocking and all subsequent antibody  
493 incubations were performed in 5% milk in TBS-T (20 mM Tris, 138 mM NaCl, 0.1% Tween-20). Primary  
494 and secondary antibody incubations proceeded for 1 h rocking at room temperature, with three TBS-T  
495 washes between primary and secondary and between secondary and imaging. Imaging was performed  
496 using a LI-COR Odyssey. Primary antibodies used were mouse anti-Ty (76) and rabbit anti-HA (71-5500,  
497 Invitrogen) or rabbit anti-TgACT1(77). Secondary antibodies were anti-mouse-800CW (LI-COR) or anti-  
498 rabbit-680RD (LI-COR).

#### 499 Live cell imaging

500 Parasites were inoculated onto glass-bottom 35mm dishes (Mattek) containing HFFs. At 24 h post-  
501 infection, intracellular parasites were imaged with an Eclipse Ti microscope (Nikon) with a 60X  
502 objective using the NIS elements imaging software and a Zyla 4.2 sCMOS camera. FIJI software was  
503 used for image analysis and processing.

#### 504 Immunofluorescence assays

505 Parasites were inoculated onto coverslips containing HFFs. At 24 h post-infection, intracellular  
506 parasites were fixed with 4% formaldehyde and permeabilized with 0.05% saponin in PBS. Nuclei were  
507 stained with Hoechst 33258 (Santa Cruz) and coverslips were mounted in Prolong Diamond (Thermo  
508 Fisher). Ty was detected using a mouse monoclonal antibody (76). HA was detected using a rabbit  
509 monoclonal antibody (71-5500, Invitrogen). Primary antibodies were detected with anti-mouse Alexa-  
510 Fluor 488 and anti-rabbit Alexa-Fluor 594 secondary antibodies (Invitrogen). Images were acquired with  
511 an Eclipse Ti microscope (Nikon) with a 60X objective using the NIS elements imaging software and a  
512 Zyla 4.2 sCMOS camera. FIJI software was used for image analysis and processing.

#### 513 Egress assays

514 Egress was quantified in a plate-based manner as in (55). HFF monolayers in a clear bottomed 96-well  
515 plate were infected with parasites and allowed to incubate 24 h before exchanging media for  
516 FluoroBrite DMEM (ThermoFisher) supplemented with 10% FBS and applying pre-treatments  
517 according to experiment type. Three images were taken before zaprinast (final concentration 500  $\mu\text{M}$ ;  
518 MilliPore Sigma) or A23187 (final concentration 8  $\mu\text{M}$ ; MilliPore Sigma) and DAPI (final concentration 5  
519  $\text{ng}/\text{mL}$ ) were added, and imaging of DAPI-stained host cell nuclei continued for 9 additional minutes  
520 before 1% Triton X-100 was added to all wells to determine the total number of host cell nuclei. Imaging  
521 was performed at  $37^\circ\text{C}$  and 5%  $\text{CO}_2$  using a Biotek Cytation 3 imaging multimode reader with a 4X  
522 objective. % egress was calculated as  $[(\text{nuclei at time}_n - \text{nuclei at time}_1)/(\text{nuclei at time}_{\text{final}} - \text{nuclei at}$   
523  $\text{time}_1)] * 100$ , and egress efficiency was normalized to egress of vehicle-treated parasites (% vehicle).  
524 Results are the mean of three wells per condition and are representative of at least three independent



525 experiments. MOI was determined by performing immunofluorescence on a parallel plate of parasite-  
526 infected HFFs. Briefly, infected monolayers were fixed and permeabilized with 100% methanol for 2  
527 min. Parasites were stained with either rabbit anti-TgALD (78) or guinea pig anti-CDPK1 antibody (79)  
528 and anti-rabbit or anti-guinea pig Alexa-Fluor 594 secondary antibody, and nuclei were stained with  
529 Hoechst 33258 (Santa Cruz Biotechnology). Imaging was performed using a Biotek Cytation 3 imaging  
530 multimode reader with a 20X objective, and parasite vacuoles and host nuclei were manually counted.

531 For AS kinase egress assays, HFFs were infected with  $5 \times 10^4$  parasites per well and treated with 3  $\mu$ M 3-  
532 MB-PP1 (Millipore Sigma) or equivalent dilution of DMSO for 20 min prior to analysis.

533 For AID egress assays, HFFs were infected with  $1 \times 10^5$  parasites per well of TIR1 parental or CDPK-AID  
534 lines and treated with 500  $\mu$ M IAA or equivalent dilution of PBS for 3 h prior to analysis.

535 For epistasis endpoint assays, HFFs were infected with  $1 \times 10^5$  parasites per well of TIR1 parental or  
536 CDPK-AID lines. Pre-treatment consisted of 500  $\mu$ M IAA or equivalent dilution of PBS for 3 h, followed  
537 by 3-MB-PP1 (series from 2.5  $\mu$ M to 0.039  $\mu$ M) or equivalent dilution of DMSO for 30 min prior to  
538 analysis, and wells were stimulated to egress with zaprinast (final concentration 500  $\mu$ M) for 20 min; all  
539 incubations were performed at 37°C and 5% CO<sub>2</sub>. Images were collected pre-stimulation (time<sub>pre</sub>), 10  
540 min post addition of zaprinast (final concentration 500  $\mu$ M) and DAPI (time<sub>stim</sub>), and 1 min post addition  
541 of 1% TritonX-100 (time<sub>final</sub>). % egress was calculated as [(nuclei at time<sub>stim</sub> - nuclei at time<sub>pre</sub>)/(nuclei at  
542 time<sub>final</sub> - nuclei at time<sub>pre</sub>)] \* 100 and normalized to wells that did not receive IAA or 3-MB-PP1 for each  
543 strain. EC<sub>50</sub> was determined by non-linear regression analysis performed using the non-sigmoidal dose-  
544 response with variable slope function in GraphPad Prism, with top constrained to 100 and bottom  
545 constrained to 0; significance was calculated using an F test to determine if all data ( $\pm$ IAA) fit to a single  
546 curve.

#### 547 **Invasion assays**

548 Briefly, parasite vacuoles were mechanically-dissociated and filtered through 5  $\mu$ m filters, pelleted, and  
549 resuspended in invasion media (HEPES-buffered DMEM without phenol red) supplemented with 1%  
550 FBS. HFF monolayers in clear-bottom 96 well plates were incubated with parasite suspensions for 10  
551 min at 37°C to stimulate invasion after centrifuging the plates at 290 x g and room temperature for 5 min.  
552 Wells were fixed with 4% formaldehyde and followed by antibody staining to differentiate between  
553 extracellular and total parasites and to detect nuclei. Samples were imaged using a Biotek Cytation3  
554 imaging multimode reader with a 20X objective and imaging in montage mode.

555 For AS kinase invasion assays, parasites were pre-treated with 3-MB-PP1 (0.33  $\mu$ M final concentration)  
556 or an equivalent dilution of DMSO in invasion media for 20 min at 37°C, then  $1 \times 10^5$  parasites were added  
557 to 3 wells of a clear-bottom 96-well plate containing HFFs. Following incubation and fixation,  
558 extracellular parasites were stained with mouse anti-SAG1 antibody (80) conjugated to Alexa594. All  
559 parasites were stained by permeabilizing with 0.25% TritonX-100 and staining with anti-SAG1 antibody  
560 conjugated to Alexa488, and nuclei were stained with DAPI. The number of invaded parasites per field  
561 of view was counted using a size-based macro and normalized to the number of host cells in the same  
562 field of view (intracellular Tg/HCN). The final invasion efficiency for each replicate was normalized to  
563 the invaded parasites per host cell nuclei of the DMSO-treated parasites (% vehicle).

564 For AID invasion assays, parasite lines were each passed to two flasks of HFFs. 24 h pre-analysis one  
565 flask was supplemented with vehicle (PBS) and the second flask was supplemented with IAA to a final  
566 concentration of 500  $\mu$ M. Following parasite harvest,  $2 \times 10^5$  parasites were added to 3 wells of a clear-  
567 bottom 96-well plate containing HFFs. Following incubation and fixation, extracellular parasites were

568 stained with mouse anti-SAG1 antibody (80). All parasites were stained by permeabilizing with 0.25%  
569 TritonX-100 and staining with rabbit anti-GAP45, generated as previously described (81) and kindly  
570 provided by R.D. Ethridge (University of Georgia, Athens). Cells were subsequently stained with anti-  
571 rabbit Alexa594 antibody (Invitrogen), anti-mouse Alexa488 antibody (Invitrogen), and Hoechst 33258  
572 (Santa Cruz Biotechnology). Images were acquired using a Cytation 3 imager (BioTek), and analyzed  
573 using custom FIJI macros to count the number of parasites and host-cell nuclei (49), plotted as  
574 intracellular Tg/HCN.

### 575 **Plaque assays**

576 CDPK-AID and TIR1 parental parasites were inoculated into 6-well plates or 15 cm dishes of HFFs  
577 maintained in DMEM supplemented with 10% FBS and incubated overnight before supplementing with  
578 IAA to a final concentration of 500  $\mu$ M or with PBS. Where indicated, plates were also supplemented  
579 with 3-MB-PP1 to a final concentration of 40 nM or with DMSO. Plates were allowed to grow  
580 undisturbed for 8 days then washed with PBS and fixed for 10 min at room temperature with 100%  
581 ethanol. Staining was performed for 5 min at room temperature with crystal violet solution, followed by  
582 two washes with PBS, one wash with water, and drying overnight. Plaques were counted manually, and  
583 plaque areas measured using FIJI software.

### 584 **FACS analysis**

585 For IAA-induced depletion experiments, intracellular parasites were treated with either 500  $\mu$ M IAA or  
586 an equivalent dilution of PBS for 1, 3, or 24 h. Following treatment, parasites were mechanically-  
587 dissociated by passing through a 27-gauge needle, isolated by filtration, and analyzed by flow  
588 cytometry with a Miltenyi MACSQuant VYB and plots were prepared using FlowJo software.

### 589 **Microneme protein secretion assays**

590 CDPK-GLuc lines were each used to inoculate two flasks of HFFs. 24 h pre-analysis one flask was  
591 supplemented with vehicle (PBS) and the second flask was supplemented with IAA to a final  
592 concentration of 500  $\mu$ M. Parasite vacuoles were mechanically-disrupted and parasites filtered through  
593 5  $\mu$ m filters, pelleted, and resuspended in cold intracellular buffer with free  $Ca^{2+}$  clamped at 100nM (ICB;  
594 137mM KCl, 5mM NaCl, 20mM HEPES, 10mM  $MgCl_2$ ).  $1 \times 10^6$  parasites were combined with ICB, ICB  
595 supplemented with 3% FBS, or ICB supplemented with zaprinast (500  $\mu$ M) or an equivalent dilution of  
596 DMSO with or without 3% FBS into 3 wells of 96 well round-bottom plate and incubated for 5 or 30 min  
597 at 37 $^{\circ}$ C to stimulate secretion. Excreted/secreted antigen (ESA)-containing supernatants were collected  
598 by centrifugation at 1200  $\times g$  for 8 min at 4 $^{\circ}$ C to pellet parasites. Parasite lysates were prepared  
599 according to Pierce Gaussia Luciferase Glow Assay Kit (ThermoFisher) and plated in triplicate with wells  
600 containing lysate from  $6.6 \times 10^5$ ,  $2.2 \times 10^5$ , and  $7.4 \times 10^4$  parasite-equivalents for each strain with or  
601 without IAA. ESAs and lysates were plated in white-bottom assay plates (PerkinElmer #6002290) and  
602 incubated at room temperature for 5 min with substrate-containing assay solution before detecting  
603 luciferase signal using a Biotek Cytation3 multimode reader. For each independent replicate,  
604 background luminescence (from wells without parasites) was subtracted from ESA luciferase values.

### 605 **3D Motility**

606 Parasites in HFF cells were treated with either 500  $\mu$ M auxin or PBS for three hours prior to harvest by  
607 mechanical dissociation. Pitta imaging chambers containing Hoechst 33342-stained parasites  
608 embedded in polymerized Matrigel were prepared as previously described (62). A Nikon Eclipse TE300

609 epifluorescence microscope (Nikon Instruments, Melville, NY) equipped with a 20x (0.65 pixel/ $\mu\text{m}$ )  
610 PlanApo  $\lambda$  (NA 0.75) objective and NanoScanZ piezo Z stage insert (Prior Scientific, Rockland, MA) was  
611 used to image the fluorescently-labeled parasite nuclei. Time-lapse video stacks were collected with an  
612 iXON Life 888 EMCCD camera (Andor Technology, Belfast, Ireland) using NIS Elements software v.5.11  
613 (Nikon Instruments, Melville, NY) and pE-4000 LED illumination (CoolLED, Andover England). Images  
614 (1024 pixel  $\times$  384 pixel) were collected 1  $\mu\text{m}$  apart in z, spanning 40  $\mu\text{m}$ . Each z slice was imaged twice,  
615 at excitation wavelengths 385 nm (Hoechst) then 490 nm (mNeonGreen), each for 15 ms, before  
616 moving to the next z slice. The same volume was successively imaged 60 times at both wavelengths  
617 over the course of 78 seconds. The volume of each video stack was therefore 665.6  $\mu\text{m}$   $\times$  249.6  $\mu\text{m}$   $\times$  40  
618  $\mu\text{m}$  (x, y, z), and each dataset contained 2  $\times$  60 stacks. The camera was set to trigger mode, no binning,  
619 readout speed of 30 MHz, conversion gain of 3.8x, and EM gain setting of 300.

620 Datasets were analyzed in Imaris  $\times$ 64 v. 9.2.0 (Bitplane AG, Zurich, Switzerland). Parasites were tracked  
621 using the ImarisTrack module within a 1018 pixel  $\times$  380 pixel region of interest to prevent artifacts from  
622 tracking objects near the border. Spot detection used estimated spot diameters of 4.0  $\times$  4.0  $\times$  8.0  $\mu\text{m}$  (x,  
623 y, z) for the fluorescently-labeled nuclei. A maximum distance of 6.0  $\mu\text{m}$  and maximum gap size of 2  
624 were applied to the tracking algorithm. Tracks with durations under ten seconds or displacements of  
625 less than 2  $\mu\text{m}$  were discarded to avoid tracking artifacts and parasites moving by Brownian motion,  
626 respectively (62). Accurate tracking was confirmed by visual inspection of parasite movements  
627 superimposed on their calculated trajectories. The mNeonGreen signal was used to confirm the  
628 expected level of the mNeonGreen-Ty-AID-tagged CDPK protein in tracked parasites; parasites that  
629 were treated with auxin and remained positive for mNeonGreen were excluded from the analysis. Each  
630 experiment analyzed three biological replicates, each consisting of three technical replicates.

### 631 **Data Availability**

632 Primers, plasmids, and parasite strains used or generated in this study can be found in **Supplementary**  
633 **Table 1**. Oligos, plasmids, and strains generated within this study are available from the corresponding  
634 author by request.

635

### 636 **ACKNOWLEDGEMENTS**

637 We thank the L.D. Sibley (Washington University in St. Louis) for the TIR1 strain; S.M. Sidik for  
638 generation of the Cas9 nickase plasmid; B.M. Markus for generation of the mNeonGreen-mAID-Ty  
639 plasmid; R.D. Etheridge (University of Georgia, Athens) for the GAP45 antibody; VEuPathDB and all  
640 contributors to this resource. This work was supported by grants from the National Institutes of Health  
641 to S.L. (R01AI144369) and G.E.W. (R01AI139201), and training grant and fellowship support for R.V.S.  
642 (T32AI055402 and F31AI145214).

643

### 644 **AUTHOR CONTRIBUTIONS**

645 E.S. and S.L. designed the overall study and experiments. C.G.H. generated and validated the AS-  
646 kinase strains and performed initial construction of complementing constructs. R.V.S. performed and  
647 quantified the gliding motility experiments. E.S. performed all remaining parasite strain construction

648 and experiments. E.S. and S.L. wrote the manuscript and all authors reviewed, offered input, and  
649 approved the final draft.

650

651 **FIGURES & LEGENDS**

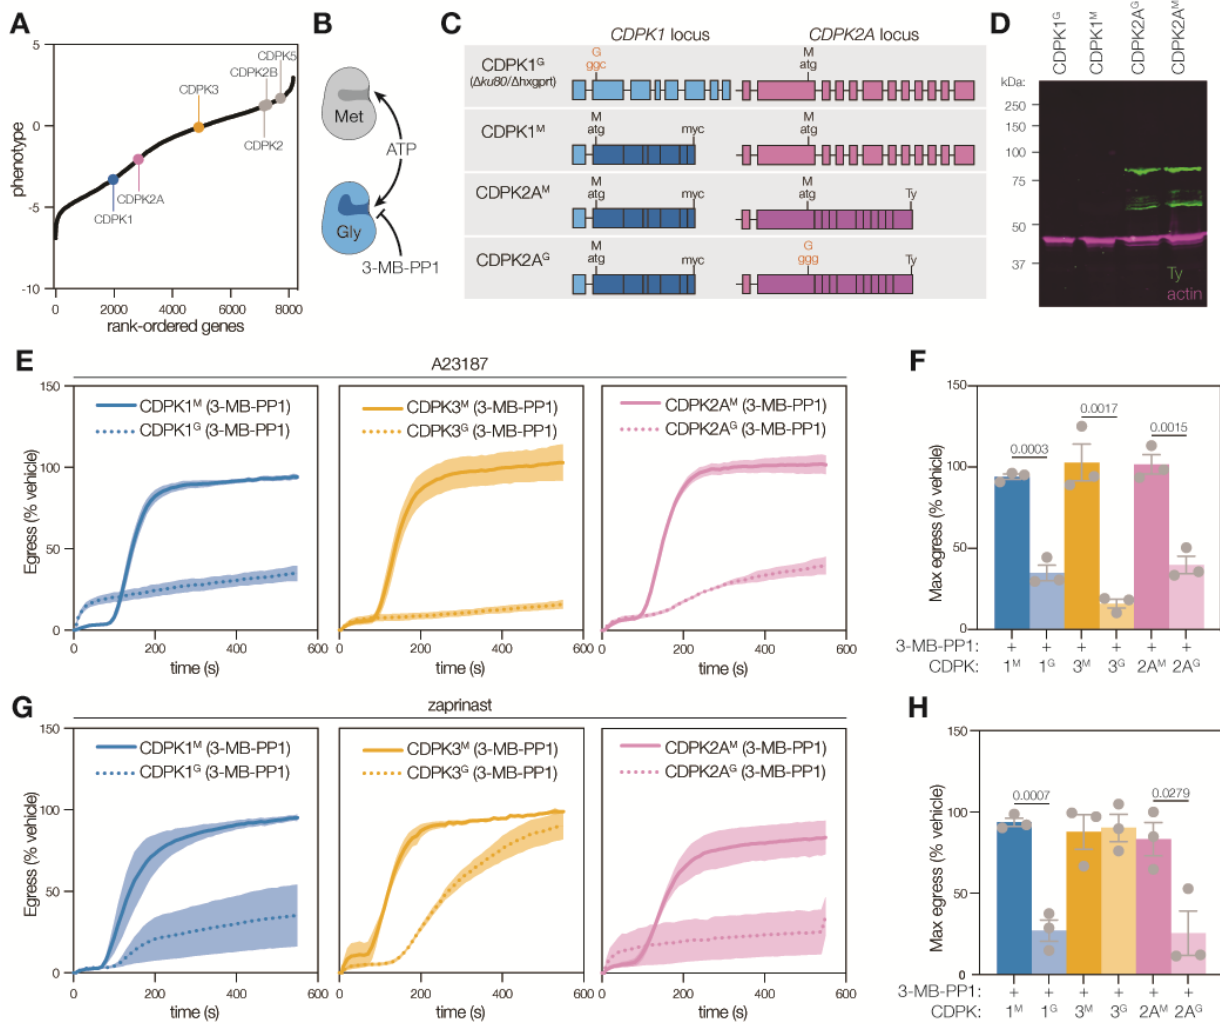

652

653 **Figure 1. CDPK2A is required for stimulated parasite egress in addition to CDPK1 and CDPK3.** **A.**  
 654 *Toxoplasma* genes ranked by their phenotype, as determined in a genome-wide knockout screen (49).  
 655 Points represent the mean phenotype score of  $n = 4$  replicates. Six canonical calcium-dependent  
 656 protein kinases are highlighted: CDPK1 (blue), CDPK3 (yellow), and CDPK2A (pink). **B.** Schematic  
 657 representation of chemical-genetics strategy. The gatekeeper residue of a kinase of interest is mutated,  
 658 with minimal impact to ATP binding but altered binding of bulky ATP-mimetic inhibitors (e.g., 3-MB-  
 659 PP1) depending on the size of the binding pocket. **C.** Schematic representation of CDPK1 and CDPK2A  
 660 loci in the analog-sensitive (AS) kinase strains. Darker shading indicates synthetic DNA. 3-MB-PP1-  
 661 sensitive alleles are highlighted in red. **D.** Immunoblot of wildtype (CDPK1<sup>G</sup>), parental (CDPK1<sup>M</sup>), and  
 662 Ty-tagged CDPK2A AS-kinase strains shows expression of the tagged kinase; ACT1 is used as a loading  
 663 control. **E.** Kinetic traces of A23187-stimulated parasite egress. Graphs are egress of 3-MB-PP1-  
 664 treated parasites as % of vehicle. A23187 was added 1 s after the start of imaging. Line plots represent the  
 665 mean  $\pm$  SEM for  $n = 3$  biological replicates. **F.** Maximum egress achieved by each strain during the 10-  
 666 minute observation window, displayed as % of vehicle. Bars represent the mean  $\pm$  SEM of  $n = 3$



667 biological replicates; significance calculated by unpaired *t*-test. **G.** Kinetic traces of zaprinast-stimulated  
668 parasite egress. Graphs are egress of 3-MB-PP<sub>1</sub>-treated parasites as % of vehicle. Zaprinast was added  
669 1 s after the start of imaging. Line plots the mean ± SEM for *n* = 3 biological replicates. **H.** Maximum  
670 egress achieved by each strain during the 10-minute observation window, displayed as % of vehicle.  
671 Bars represent the mean ± SEM of *n* = 3 biological replicates; significance calculated by unpaired *t*-test.  
672

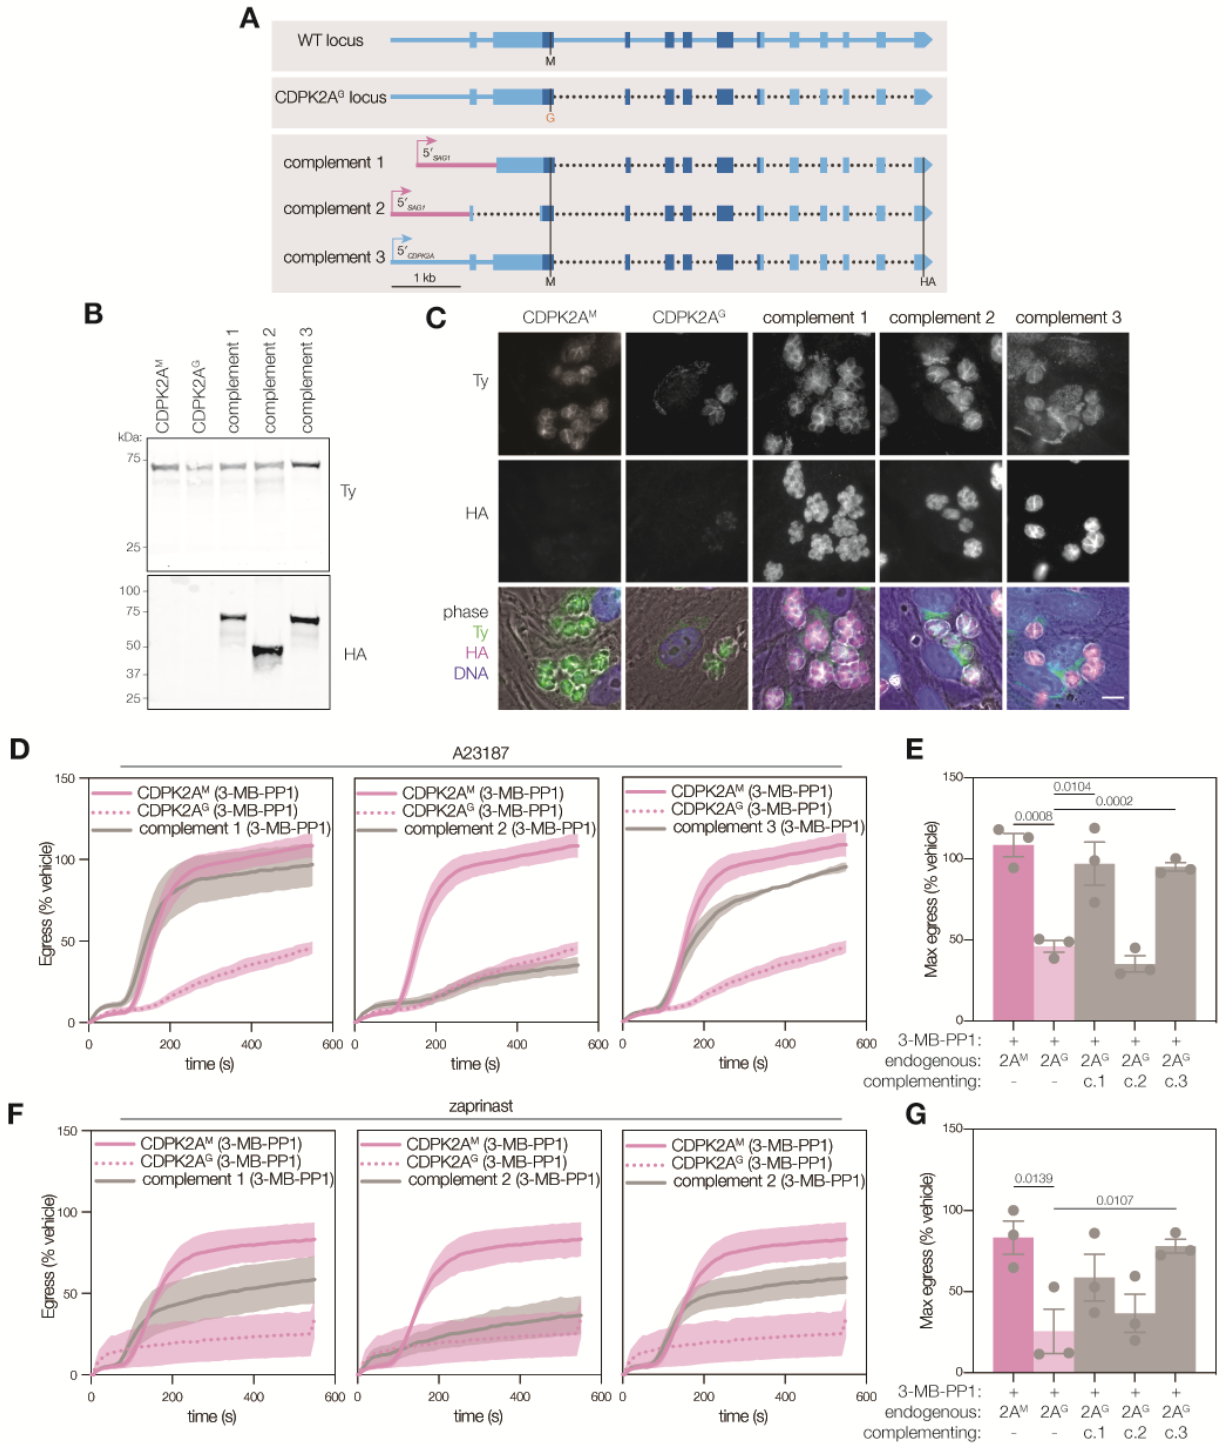

673

674 **Figure 2. The N-terminal extension of CDPK2A influences its localization and is necessary for**  
 675 **parasite egress.** **A.** Schematic representation of complementing constructs with comparison to  
 676 CDPK2A genomic locus. Dotted lines indicate gaps in sequence where introns have been removed.  
 677 Shaded region encoding the kinase domain. **B.** Immunoblot of complemented strains probing for the  
 678 endogenous allele with Ty and the complementing allele with HA. **C.** Immunofluorescence microscopy  
 679 of endogenously Ty-tagged CDPK2A<sup>M</sup> and CDPK2A<sup>G</sup> and HA-tagged complementing copies of

680 CDPK $\zeta$ A<sup>M</sup>. Merged image displays Ty (green), HA (magenta), DNA (blue), and phase (greyscale). Scale  
681 bar is 10  $\mu$ m. **D.** Kinetic traces of A23187-stimulated parasite egress. Graphs are egress of 3-MB-PP1-  
682 treated parasites as % of vehicle. A23187 was added 1 s after the start of imaging. Line plots represent  
683 mean  $\pm$  SEM for  $n = 3$  biological replicates. **E.** Maximum egress achieved by each strain during the  
684 observation window, displayed as % of vehicle. Bars represent mean  $\pm$  SEM of  $n = 3$  biological  
685 replicates; significance calculated by unpaired one-tailed  $t$ -test. **F.** Kinetic traces of zaprinast-  
686 stimulated parasite egress. Graphs are egress of 3-MB-PP1-treated parasites as % of vehicle. Zaprinast  
687 was added 1 s after the start of imaging. Line plots represent mean  $\pm$  SEM for  $n = 3$  biological replicates.  
688 **G.** Maximum egress achieved by each strain during the observation window, displayed as % of vehicle.  
689 Bars represent the mean  $\pm$  SEM of  $n = 3$  biological replicates; significance calculated by unpaired one-  
690 tailed  $t$ -test.  
691

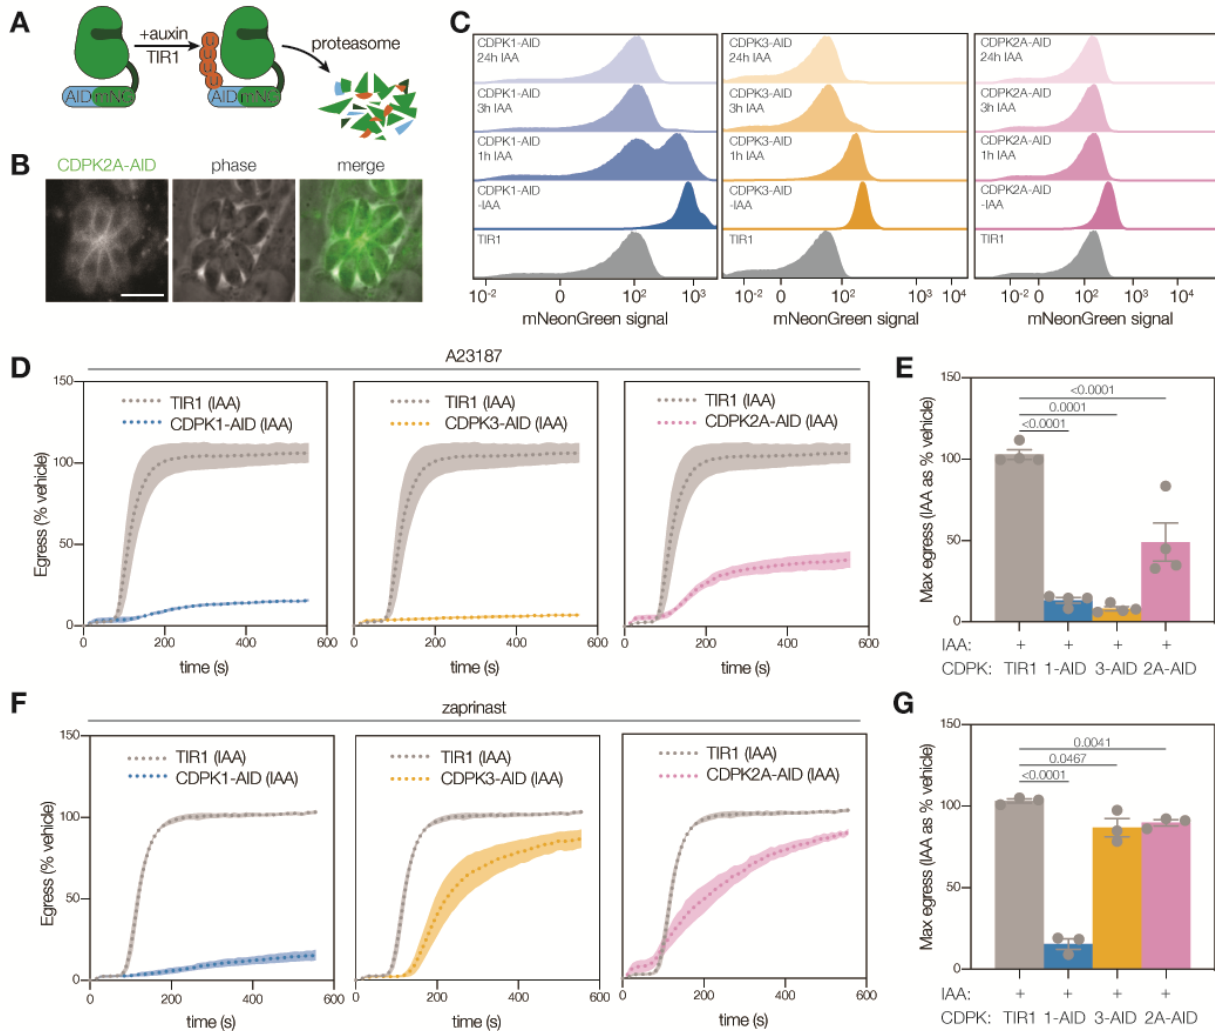

692

693 **Figure 3. Conditional depletion of CDPKs reveals CDPK2A is required for A23187-stimulated egress,**

694 **but not for zaprinast-stimulated egress. A.** Schematic representation of a CDPK tagged with a

695 minimal auxin-inducible degron (mAID), Ty, and mNeonGreen. When IAA is added, the TIR1 ubiquitin

696 ligase complex is recruited to the tagged protein and targets it for proteasomal degradation. **B.** Live-

697 cell imaging of CDPK2A-AID parasites shows the mNeonGreen signal concentrated at the parasite

698 periphery. Scale bar is 10  $\mu$ m. **C.** FACS analysis of mNeonGreen-tagged CDPK-AID parasites and TIR1

699 parental line with and without the addition of auxin (IAA) shows expression of mNeonGreen fusion and

700 kinetics of auxin-induced depletion. **D.** Kinetic traces of A23187-stimulated parasite egress. Graphs are

701 egress of 3-MB-PP<sub>1</sub>-treated parasites as % of vehicle. A23187 was added 1 s after the start of imaging.

702 Line plots represent mean  $\pm$  SEM for  $n = 4$  biological replicates. **E.** Maximum egress achieved by each

703 strain during the observation window, displayed as % of vehicle. Bars represent mean  $\pm$  SEM of  $n = 4$

704 biological replicates; significance calculated by unpaired  $t$ -test. **F.** Kinetic traces of zaprinast-stimulated

705 parasite egress. Graphs are egress of 3-MB-PP<sub>1</sub>-treated parasites as % of vehicle. Zaprinast was added

706 1 s after the start of imaging. Line plots the mean for  $n = 3$  biological replicates with error bands

707 representing SEM. **G.** Maximum egress achieved by each strain during the observation window,

708 displayed as % of vehicle. Bars represent the mean  $\pm$  SEM of  $n = 3$  biological replicates; significance  
709 calculated by unpaired  $t$ -test.

710



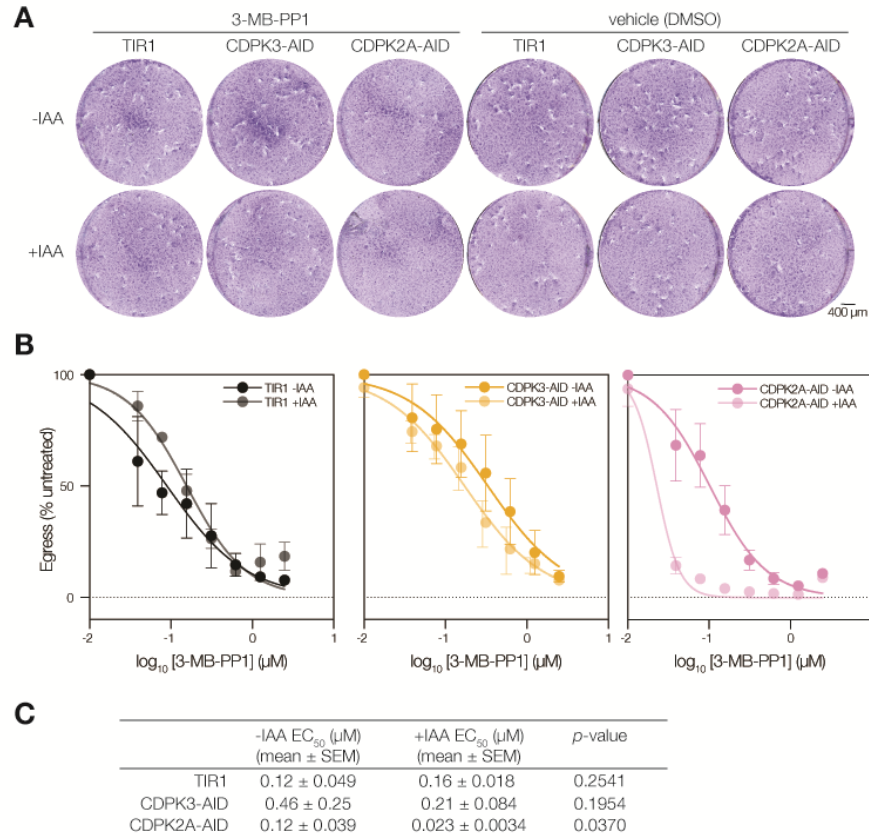

711

712 **Figure 4. CDPK1 and CDPK2A comprise a signaling module that regulates zaprinast-stimulated**  
 713 **egress and the lytic cycle. A.** Partial inhibition of endogenous CDPK1<sup>G</sup> by 3-MB-PP1 (40nM) leads to  
 714 ablation of plaque formation by parasites conditionally depleted of CDPK2A. Scale bar represents 400  
 715 μm. **B.** Dose-response of CDPK1 inhibition with 3-MB-PP1 monitoring endpoint zaprinast-stimulated  
 716 egress in parasites depleted of or expressing the indicated CDPK. Mean ± SEM plotted for *n* = 3  
 717 biological replicates. **C.** EC<sub>50</sub> (μM) for 3-MB-PP1 of CDPK-depleted or untreated parasites; significance  
 718 calculated by unpaired one-tailed *t*-test across *n* = 3 biological replicates.

719

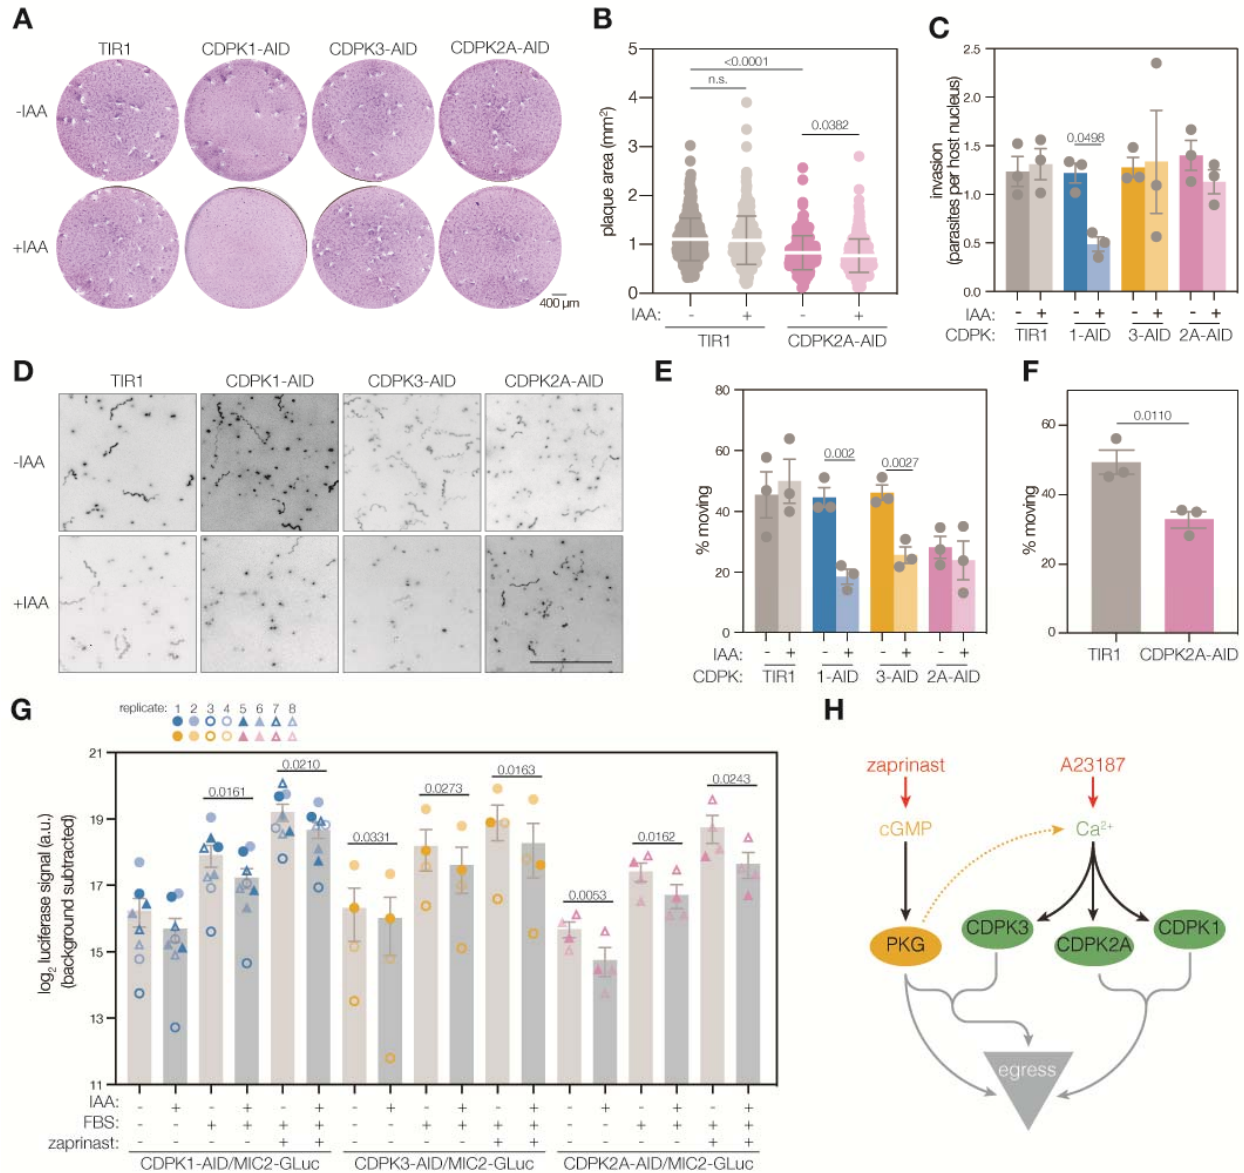

720

721 **Figure 5. CDPK2A impacts plaque formation, gliding motility, and microneme discharge. A.**

722 Depletion of each of the three CDPKs impacted plaque formation differently: parasites depleted of  
 723 CDPK1 formed no plaques, those depleted of CDPK2A formed smaller plaques, and those depleted of  
 724 CDPK3 plaqued normally. Images are representative of  $n = 4$  biological replicates. Scale bar is 400  $\mu$ m.

725 **B.** CDPK2A-AID parasites form smaller plaques than the TIR1 parental line, and the effect is  
 726 exacerbated by the depletion of the kinase (+ IAA). Scatter plot displays areas for >270 individual  
 727 plaques per sample; mean  $\pm$  SD is overlaid;  $p$  value calculated by unpaired  $t$ -test. **C.** CDPK2A depletion  
 728 does not impact parasites' ability to invade host cells. Bars represent the mean  $\pm$  SEM for  $n = 3$   
 729 biological replicates;  $p$  value calculated by paired  $t$ -test. **D.** 3D gliding motility in Matrigel following  
 730 depletion of each kinase. Maximum intensity projections of tracked parasites. Scale bar is 100  $\mu$ m. **E.**  
 731 Proportion of parasites observed moving in 3D gliding motility assays. Each point is the mean of 3  
 732 technical replicates with 634-1500 observations per condition; bars represent the mean  $\pm$  SEM of  $n = 3$

733 biological replicates; significance calculated by unpaired one-tailed *t*-test. **F.** Direct comparison of the  
734 proportion of parasites gliding in 3D for TIR1 and CDPK2A-AID parasites without IAA. Each point is the  
735 mean of 3 technical replicates with 1011 and 1157 observations for TIR1 and CDPK2A-AID respectively;  
736 bars represent the mean  $\pm$  SEM of  $n = 3$  biological replicates; significance calculated by unpaired one-  
737 tailed *t*-test. **G.** Depletion of CDPKs decreases microneme discharge. Gaussia-luciferase activity, from a  
738 microneme-localized construct, was assayed in supernatants following 30 minutes of stimulation with  
739 FBS and zaprinast. Points represent individual biological replicates ( $n = 8$  for CDPK1-AID,  $n = 4$  for  
740 CDPK3-AID or CDPK2A-AID), with bars indicating mean  $\pm$  SEM; significance calculated by paired one-  
741 tailed *t*-test. **H.** Proposed model for the relationship between kinases that positively regulate parasite  
742 motility.  
743

744 REFERENCES

- 745 1. Clapham DE. 2007. Calcium signaling. *Cell* 131:1047–1058.
- 746 2. Endo T, Sethi KK, Piekarski G. 1982. *Toxoplasma gondii*: calcium ionophore A23187-mediated exit  
747 of trophozoites from infected murine macrophages. *Exp Parasitol* 53:179–188.
- 748 3. Moreno SNJ, Zhong L. 1996. Acidocalcisomes in *Toxoplasma gondii* tachyzoites. *Biochemical*  
749 *Journal* <https://doi.org/10.1042/bj3130655>.
- 750 4. Stommel EW, Ely KH, Schwartzman JD, Kasper LH. 1997. *Toxoplasma gondii*: dithiol-induced Ca<sup>2+</sup>  
751 flux causes egress of parasites from the parasitophorous vacuole. *Exp Parasitol* 87:88–97.
- 752 5. Borges-Pereira L, Budu A, McKnight CA, Moore CA, Vella SA, Hortua Triana MA, Liu J, Garcia CRS,  
753 Pace DA, Moreno SNJ. 2015. Calcium Signaling throughout the *Toxoplasma gondii* Lytic Cycle. *J*  
754 *Biol Chem* 290:26914–26926.
- 755 6. Lovett JL, Sibley LD. 2003. Intracellular calcium stores in *Toxoplasma gondii* govern invasion of  
756 host cells. *J Cell Sci* 116:3009–3016.
- 757 7. Sidik SM, Hortua Triana MA, Paul AS, El Bakkouri M, Hackett CG, Tran F, Westwood NJ, Hui R,  
758 Zuercher WJ, Duraisingh MT, Moreno SNJ, Lourido S. 2016. Using a Genetically Encoded Sensor to  
759 Identify Inhibitors of *Toxoplasma gondii* Ca<sup>2+</sup> Signaling. *J Biol Chem* 291:9566–9580.
- 760 8. Singh S, Mahmood Alam M, Pal-Bhowmick I, Brzostowski JA, Chitnis CE. 2010. Distinct External  
761 Signals Trigger Sequential Release of Apical Organelles during Erythrocyte Invasion by Malaria  
762 Parasites. *PLoS Pathogens* <https://doi.org/10.1371/journal.ppat.1000746>.
- 763 9. Agarwal S, Singh MK, Garg S, Chitnis CE, Singh S. 2013. Ca<sup>2+</sup>-mediated exocytosis of subtilisin-  
764 like protease 1: a key step in egress of *Plasmodium falciparum* merozoites. *Cell Microbiol* 15:910–  
765 921.
- 766 10. Dvorin JD, Martyn DC, Patel SD, Grimley JS, Collins CR, Hopp CS, Bright AT, Westenberger S,  
767 Winzeler E, Blackman MJ, Baker DA, Wandless TJ, Duraisingh MT. 2010. A plant-like kinase in  
768 *Plasmodium falciparum* regulates parasite egress from erythrocytes. *Science* 328:910–912.
- 769 11. Siden-Kiamos I, Ecker A, Nyback S, Louis C, Sinden RE, Billker O. 2006. *Plasmodium berghei*  
770 calcium-dependent protein kinase 3 is required for ookinete gliding motility and mosquito midgut  
771 invasion. *Molecular Microbiology* <https://doi.org/10.1111/j.1365-2958.2006.05189.x>.
- 772 12. Wetzel DM, Chen LA, Ruiz FA, Moreno SNJ, Sibley LD. 2004. Calcium-mediated protein secretion  
773 potentiates motility in *Toxoplasma gondii*. *J Cell Sci* 117:5739–5748.
- 774 13. Pace DA, McKnight CA, Liu J, Jimenez V, Moreno SNJ. 2014. Calcium Entry in *Toxoplasma*  
775 *gondii* and Its Enhancing Effect of Invasion-linked Traits. *J Biol Chem* 289:19637–19647.

- 776 14. Lourido S, Moreno SNJ. 2015. The calcium signaling toolkit of the Apicomplexan parasites  
777 *Toxoplasma gondii* and *Plasmodium* spp. *Cell Calcium* 57:186–193.
- 778 15. Fang H, Gomes AR, Klages N, Pino P, Maco B, Walker EM, Zenonos ZA, Angrisano F, Baum J,  
779 Doerig C, Baker DA, Billker O, Brochet M. 2018. Epistasis studies reveal redundancy among  
780 calcium-dependent protein kinases in motility and invasion of malaria parasites. *Nat Commun* 9:1–  
781 14.
- 782 16. Brown KM, Lourido S, Sibley LD. 2016. Serum Albumin Stimulates Protein Kinase G-dependent  
783 Microneme Secretion in *Toxoplasma gondii*. *J Biol Chem* 291:9554–9565.
- 784 17. Brochet M, Collins MO, Smith TK, Thompson E, Sebastian S, Volkmann K, Schwach F, Chappell L,  
785 Gomes AR, Berriman M, Rayner JC, Baker DA, Choudhary J, Billker O. 2014. Phosphoinositide  
786 Metabolism Links cGMP-Dependent Protein Kinase G to Essential Ca<sup>2+</sup> Signals at Key Decision  
787 Points in the Life Cycle of Malaria Parasites 12:e1001806–15.
- 788 18. Howard BL, Harvey KL, Stewart RJ, Azevedo MF, Crabb BS, Jennings IG, Sanders PR, Manallack  
789 DT, Thompson PE, Tonkin CJ, Gilson PR. 2015. Identification of potent phosphodiesterase  
790 inhibitors that demonstrate cyclic nucleotide-dependent functions in apicomplexan parasites. *ACS*  
791 *Chem Biol* 10:1145–1154.
- 792 19. Lourido S, Tang K, Sibley LD. 2012. Distinct signalling pathways control *Toxoplasma* egress and  
793 host-cell invasion. *EMBO J* 31:4524–4534.
- 794 20. Collins CR, Hackett F, Strath M, Penzo M, Withers-Martinez C, Baker DA, Blackman MJ. 2013.  
795 Malaria parasite cGMP-dependent protein kinase regulates blood stage merozoite secretory  
796 organelle discharge and egress. *PLoS Pathog* 9:e1003344.
- 797 21. Bullen HE, Jia Y, Yamaro-Botte Y, Bisio H, Zhang O, Jemelin NK, Marq J-B, Carruthers V, Botte  
798 CY, Soldati-Favre D. 2016. Phosphatidic Acid-Mediated Signaling Regulates Microneme Secretion  
799 in *Toxoplasma*. *Cell Host Microbe* 19:349–360.
- 800 22. Carruthers VB, Giddings OK, Sibley LD. 1999. Secretion of micronemal proteins is associated with  
801 *toxoplasma* invasion of host cells. *Cell Microbiol* 1:225–235.
- 802 23. Carruthers VB, Sibley LD. 1999. Mobilization of intracellular calcium stimulates microneme  
803 discharge in *Toxoplasma gondii*. *Mol Microbiol* 31:421–428.
- 804 24. Carruthers VB, Sherman GD, Sibley LD. 2000. The *Toxoplasma* adhesive protein MIC2 is  
805 proteolytically processed at multiple sites by two parasite-derived proteases. *J Biol Chem*  
806 275:14346–14353.
- 807 25. Jacot D, Tosetti N, Pires I, Stock J, Graindorge A, Hung Y-F, Han H, Tewari R, Kursula I, Soldati-  
808 Favre D. 2016. An Apicomplexan Actin-Binding Protein Serves as a Connector and Lipid Sensor to  
809 Coordinate Motility and Invasion. *Cell Host Microbe* 20:731–743.

- 810 26. Sultan AA, Thathy V, Frevert U, Robson KJ, Crisanti A, Nussenzweig V, Nussenzweig RS, Ménard  
811 R. 1997. TRAP is necessary for gliding motility and infectivity of plasmodium sporozoites. *Cell*  
812 90:511–522.
- 813 27. Lagal V, Binder EM, Huynh M-H, Kafsack BFC, Harris PK, Diez R, Chen D, Cole RN, Carruthers VB,  
814 Kim K. 2010. Toxoplasma gondii protease TgSUB1 is required for cell surface processing of  
815 micronemal adhesive complexes and efficient adhesion of tachyzoites. *Cell Microbiol* 12:1792–  
816 1808.
- 817 28. Dowse T, Soldati D. 2004. Host cell invasion by the apicomplexans: the significance of microneme  
818 protein proteolysis. *Curr Opin Microbiol* 7:388–396.
- 819 29. Kafsack BFC, Pena JDO, Coppens I, Ravindran S, Boothroyd JC, Carruthers VB. 2009. Rapid  
820 membrane disruption by a perforin-like protein facilitates parasite exit from host cells. *Science*  
821 323:530–533.
- 822 30. Sivagurunathan S, Heaslip A, Liu J, Hu K. 2013. Identification of functional modules of AKMT, a  
823 novel lysine methyltransferase regulating the motility of Toxoplasma gondii. *Mol Biochem*  
824 *Parasitol* 189:43–53.
- 825 31. Deligianni E, Morgan RN, Bertuccini L, Wirth CC, Silmon de Monerri NC, Spanos L, Blackman MJ,  
826 Louis C, Pradel G, Siden-Kiamos I. 2013. A perforin-like protein mediates disruption of the  
827 erythrocyte membrane during egress of Plasmodium berghei male gametocytes. *Cell Microbiol*  
828 15:1438–1455.
- 829 32. Wirth CC, Glushakova S, Scheuermayer M, Repnik U, Garg S, Schaack D, Kachman MM, Weißbach  
830 T, Zimmerberg J, Dandekar T, Griffiths G, Chitnis CE, Singh S, Fischer R, Pradel G. 2014. Perforin-  
831 like protein PPLP 2 permeabilizes the red blood cell membrane during egress of *P. lasmodium*  
832 *falciparum* gametocytes. *Cellular Microbiology* <https://doi.org/10.1111/cmi.12288>.
- 833 33. Garg S, Agarwal S, Kumar S, Yazdani SS, Chitnis CE, Singh S. 1AD. Calcium-dependent  
834 permeabilization of erythrocytes by a perforin-like protein during egress of malaria parasites. *Nat*  
835 *Commun* 4:1736–1712.
- 836 34. Chen X-M, O’Hara SP, Huang BQ, Nelson JB, Lin JJ-C, Zhu G, Ward HD, LaRusso NF. 2004. Apical  
837 Organelle Discharge by *Cryptosporidium parvum* Is Temperature, Cytoskeleton, and Intracellular  
838 Calcium Dependent and Required for Host Cell Invasion. *Infection and Immunity*  
839 <https://doi.org/10.1128/iai.72.12.6806-6816.2004>.
- 840 35. Wiersma HI, Galuska SE, Tomley FM, Sibley LD, Liberator PA, Donald RGK. 2004. A role for  
841 coccidian cGMP-dependent protein kinase in motility and invasion. *Int J Parasitol* 34:369–380.
- 842 36. Gantt S, Persson C, Rose K, Birkett AJ, Abagyan R, Nussenzweig V. 2000. Antibodies against  
843 thrombospondin-related anonymous protein do not inhibit Plasmodium sporozoite infectivity in



- 844 vivo. *Infect Immun* 68:3667–3673.
- 845 37. Billker O, Lourido S, Sibley LD. 2009. Calcium-dependent signaling and kinases in apicomplexan  
846 parasites. *Cell Host Microbe* 5:612–622.
- 847 38. Harper JF, Breton G, Harmon A. 2004. DECODING Ca<sup>2+</sup> SIGNALS THROUGH PLANT PROTEIN  
848 KINASES. *Annual Review of Plant Biology*  
849 <https://doi.org/10.1146/annurev.arplant.55.031903.141627>.
- 850 39. Harmon AC, Gribskov M, Harper JF. 2000. CDPKs - a kinase for every Ca<sup>2+</sup> signal? *Trends Plant Sci*  
851 5:154–159.
- 852 40. Lee JY, Yoo BC, Harmon AC. 1998. Kinetic and calcium-binding properties of three calcium-  
853 dependent protein kinase isoenzymes from soybean. *Biochemistry* 37:6801–6809.
- 854 41. McCoy JM, Whitehead L, van Dooren GG, Tonkin CJ. 2012. TgCDPK3 regulates calcium-dependent  
855 egress of *Toxoplasma gondii* from host cells. *PLoS Pathog* 8:e1003066.
- 856 42. Long S, Wang Q, Sibley LD. 2016. Analysis of Noncanonical Calcium-Dependent Protein Kinases in  
857 *Toxoplasma gondii* by Targeted Gene Deletion Using CRISPR/Cas9. *Infect Immun* 84:1262–1273.
- 858 43. Morlon-Guyot J, Berry L, Chen C-T, Gubbels M-J, Lebrun M, Daher W. 2014. The *Toxoplasma*  
859 *gondii* calcium-dependent protein kinase 7 is involved in early steps of parasite division and is  
860 crucial for parasite survival. *Cell Microbiol* 16:95–114.
- 861 44. Bansal P, Antil N, Kumar M, Yamaro-Botté Y, Rawat RS, Pinto S, Datta KK, Katris NJ, Botté CY,  
862 Prasad TSK, Sharma P. 2021. Protein kinase TgCDPK7 regulates vesicular trafficking and  
863 phospholipid synthesis in *Toxoplasma gondii*. *PLoS Pathog* 17:e1009325.
- 864 45. Billker O, Dechamps S, Tewari R, Wenig G, Franke-Fayard B, Brinkmann V. 2004. Calcium and a  
865 calcium-dependent protein kinase regulate gamete formation and mosquito transmission in a  
866 malaria parasite. *Cell* 117:503–514.
- 867 46. Bansal A, Molina-Cruz A, Brzostowski J, Mu J, Miller LH. 2017. *Plasmodium falciparum* Calcium-  
868 Dependent Protein Kinase 2 Is Critical for Male Gametocyte Exflagellation but Not Essential for  
869 Asexual Proliferation. *MBio* 8.
- 870 47. Lourido S, Shuman J, Zhang C, Shokat KM, Hui R, Sibley LD. 2010. Calcium-dependent protein  
871 kinase 1 is an essential regulator of exocytosis in *Toxoplasma*. *Nature* 465:359–362.
- 872 48. Absalon S, Blomqvist K, Rudlaff RM, DeLano TJ, Pollastri MP, Dvorin JD. 2018. Calcium-  
873 Dependent Protein Kinase 5 Is Required for Release of Egress-Specific Organelles in *Plasmodium*  
874 *falciparum*. *MBio* 9.
- 875 49. Sidik SM, Huet D, Ganesan SM, Huynh M-H, Wang T, Nasamu AS, Thiru P, Saeij JPJ, Carruthers

- 876 VB, Niles JC, Lourido S. 2016. A Genome-wide CRISPR Screen in Toxoplasma Identifies Essential  
877 Apicomplexan Genes. *Cell* 166:1423–1435.e12.
- 878 50. Wernimont AK, Artz JD, Finerty P Jr, Lin Y-H, Amani M, Allali-Hassani A, Senisterra G, Vedadi M,  
879 Tempel W, Mackenzie F, Chau I, Lourido S, Sibley LD, Hui R. 2010. Structures of apicomplexan  
880 calcium-dependent protein kinases reveal mechanism of activation by calcium. *Nat Struct Mol Biol*  
881 17:596–601.
- 882 51. Sugi T, Kato K, Kobayashi K, Watanabe S, Kurokawa H, Gong H, Pandey K, Takemae H, Akashi H.  
883 2010. Use of the kinase inhibitor analog 1NM-PP1 reveals a role for *Toxoplasma gondii* CDPK1 in  
884 the invasion step. *Eukaryot Cell* 9:667–670.
- 885 52. Bishop AC, Shah K, Liu Y, Witucki L, Kung C, Shokat KM. 1998. Design of allele-specific inhibitors  
886 to probe protein kinase signaling. *Curr Biol* 8:257–266.
- 887 53. Garrison E, Trecek M, Ehret E, Butz H, Garbuz T, Oswald BP, Settles M, Boothroyd J, Arrizabalaga  
888 G. 2012. A forward genetic screen reveals that calcium-dependent protein kinase 3 regulates  
889 egress in *Toxoplasma*. *PLoS Pathog* 8:e1003049.
- 890 54. Stewart RJ, Whitehead L, Nijagal B, Sleebs BE, Lessene G, McConville MJ, Rogers KL, Tonkin CJ.  
891 2017. Analysis of Ca<sup>2+</sup> mediated signaling regulating *Toxoplasma* infectivity reveals complex  
892 relationships between key molecules. *Cell Microbiol* 19.
- 893 55. Shortt E, Lourido S. 2020. Plate-Based Quantification of Stimulated *Toxoplasma* Egress. *Methods*  
894 *Mol Biol* 2071:171–186.
- 895 56. Sugi T, Kobayashi K, Takemae H, Gong H, Ishiwa A, Murakoshi F, Recuenco FC, Iwanaga T,  
896 Horimoto T, Akashi H, Kato K. 2013. Identification of mutations in TgMAPK1 of *Toxoplasma gondii*  
897 conferring resistance to 1NM-PP1. *Int J Parasitol Drugs Drug Resist* 3:93–101.
- 898 57. Long S, Brown KM, Drewry LL, Anthony B, Phan IQH, Sibley LD. 2017. Calmodulin-like proteins  
899 localized to the conoid regulate motility and cell invasion by *Toxoplasma gondii*. *PLoS Pathog*  
900 13:e1006379.
- 901 58. Brown KM, Long S, Sibley LD. 2017. Plasma Membrane Association by N-Acylation Governs PKG  
902 Function in *Toxoplasma gondii*. *MBio* 8:e00375–17.
- 903 59. Nishimura K, Fukagawa T, Takisawa H, Kakimoto T, Kanemaki M. 2009. An auxin-based degron  
904 system for the rapid depletion of proteins in nonplant cells. *Nat Methods* 6:917–922.
- 905 60. Lourido S, Zhang C, Lopez MS, Tang K, Barks J, Wang Q, Wildman SA, Shokat KM, Sibley LD.  
906 2013. Optimizing small molecule inhibitors of calcium-dependent protein kinase 1 to prevent  
907 infection by *Toxoplasma gondii*. *J Med Chem* 56:3068–3077.
- 908 61. Drewry LL, Sibley LD. 2019. The hitchhiker’s guide to parasite dissemination. *Cell Microbiol*

- 909 e13070–15.
- 910 62. Leung JM, Rould MA, Konradt C, Hunter CA, Ward GE. 2014. Disruption of TgPHIL1 Alters Specific  
911 Parameters of *Toxoplasma gondii* Motility Measured in a Quantitative, Three-Dimensional Live  
912 Motility Assay. *PLoS One* 9:e85763–10.
- 913 63. Gaji RY, Johnson DE, Treeck M, Wang M, Hudmon A, Arrizabalaga G. 2015. Phosphorylation of a  
914 Myosin Motor by TgCDPK3 Facilitates Rapid Initiation of Motility during *Toxoplasma gondii*  
915 egress. *PLoS Pathog* 11:e1005268.
- 916 64. Govindasamy K, Bhanot P. 2020. Overlapping and distinct roles of CDPK family members in the  
917 pre-erythrocytic stages of the rodent malaria parasite, *Plasmodium berghei*. *PLoS Pathog*  
918 16:e1008131.
- 919 65. Bansal A, Ojo KK, Mu J, Maly DJ, Van Voorhis WC, Miller LH. 2016. Reduced Activity of Mutant  
920 Calcium-Dependent Protein Kinase 1 Is Compensated in *Plasmodium falciparum* through the  
921 Action of Protein Kinase G. *MBio* 7.
- 922 66. Bansal A, Molina-Cruz A, Brzostowski J, Liu P, Luo Y, Gunalan K, Li Y, Ribeiro JMC, Miller LH. 2018.  
923 PfCDPK1 is critical for malaria parasite gametogenesis and mosquito infection. *Proc Natl Acad Sci*  
924 U S A 115:774–779.
- 925 67. Winterbach W, Van Mieghem P, Reinders M, Wang H, de Ridder D. 2013. Topology of molecular  
926 interaction networks. *BMC Syst Biol* 7:90.
- 927 68. Dominicus C, Nofal SD, Broncel M, Kastris NJ, Flynn H, Arrizabalaga G, Botté CY, Invergo BM,  
928 Treeck M. 2021. A positive feedback loop mediates crosstalk between calcium, cyclic nucleotide  
929 and lipid signalling in *Toxoplasma gondii*. *bioRxiv*.
- 930 69. Huynh M-H, Carruthers VB. 2006. *Toxoplasma* MIC2 is a major determinant of invasion and  
931 virulence. *PLoS Pathog* 2:e84.
- 932 70. Boucher LE, Bosch J. 2015. The apicomplexan glideosome and adhesins - Structures and function.  
933 *J Struct Biol* 190:93–114.
- 934 71. Broncel M, Dominicus C, Vigetti L, Nofal SD, Bartlett EJ, Touquet B, Hunt A, Wallbank BA,  
935 Federico S, Matthews S, Young JC, Tate EW, Tardieux I, Treeck M. 2020. Profiling of  
936 myristoylation in *Toxoplasma gondii* reveals an N-myristoylated protein important for host cell  
937 penetration. *Elife* 9.
- 938 72. Foe IT, Child MA, Majmudar JD, Krishnamurthy S, van der Linden WA, Ward GE, Martin BR, Bogyo  
939 M. 2015. Global Analysis of Palmitoylated Proteins in *Toxoplasma gondii*. *Cell Host Microbe*  
940 18:501–511.
- 941 73. Amos B, Aurrecochea C, Barba M, Barreto A, Basenko EY, Bazant W, Belnap R, Blevins AS,

- 942 Böhme U, Brestelli J, Brunk BP, Caddick M, Callan D, Campbell L, Christensen MB, Christophides  
943 GK, Crouch K, Davis K, DeBarry J, Doherty R, Duan Y, Dunn M, Falke D, Fisher S, Flicek P, Fox B,  
944 Gajria B, Giraldo-Calderón GI, Harb OS, Harper E, Hertz-Fowler C, Hickman MJ, Howington C, Hu  
945 S, Humphrey J, Iodice J, Jones A, Judkins J, Kelly SA, Kissinger JC, Kwon DK, Lamoureux K, Lawson  
946 D, Li W, Lies K, Lodha D, Long J, MacCallum RM, Maslen G, McDowell MA, Nabrzyski J, Roos DS,  
947 Rund SSC, Schulman SW, Shanmugasundram A, Sitnik V, Spruill D, Starns D, Stoeckert CJ, Tomko  
948 SS, Wang H, Warrenfeltz S, Wieck R, Wilkinson PA, Xu L, Zheng J. 2022. VEuPathDB: the  
949 eukaryotic pathogen, vector and host bioinformatics resource center. *Nucleic Acids Res* 50:D898–  
950 D911.
- 951 74. Ishino T, Orito Y, Chinzei Y, Yuda M. 2006. A calcium-dependent protein kinase regulates  
952 Plasmodium ookinete access to the midgut epithelial cell. *Mol Microbiol* 59:1175–1184.
- 953 75. Gurnett AM, Liberator PA, Dulski PM, Salowe SP, Donald RGK, Anderson JW, Wiltsie J, Diaz CA,  
954 Harris G, Chang B, Darkin-Rattray SJ, Nare B, Crumley T, Blum PS, Misura AS, Tamas T, Sardana  
955 MK, Yuan J, Biftu T, Schmatz DM. 2002. Purification and molecular characterization of cGMP-  
956 dependent protein kinase from Apicomplexan parasites. A novel chemotherapeutic target. *J Biol*  
957 *Chem* 277:15913–15922.
- 958 76. Bastin P, Bagherzadeh Z, Matthews KR, Gull K. 1996. A novel epitope tag system to study protein  
959 targeting and organelle biogenesis in *Trypanosoma brucei*. *Mol Biochem Parasitol* 77:235–239.
- 960 77. Dobrowolski JM, Carruthers VB, Sibley LD. 1997. Participation of myosin in gliding motility and  
961 host cell invasion by *Toxoplasma gondii*. *Mol Microbiol* 26:163–173.
- 962 78. Starnes GL, Jewett TJ, Carruthers VB, Sibley LD. 2006. Two separate, conserved acidic amino acid  
963 domains within the *Toxoplasma gondii* MIC2 cytoplasmic tail are required for parasite survival. *J*  
964 *Biol Chem* 281:30745–30754.
- 965 79. Waldman BS, Schwarz D, Wadsworth MH 2nd, Saeij JP, Shalek AK, Lourido S. 2020. Identification  
966 of a Master Regulator of Differentiation in *Toxoplasma*. *Cell* 180:359–372.e16.
- 967 80. Burg JL, Perelman D, Kasper LH, Ware PL, Boothroyd JC. 1988. Molecular analysis of the gene  
968 encoding the major surface antigen of *Toxoplasma gondii*. *J Immunol* 141:3584–3591.
- 969 81. Plattner F, Yarovinsky F, Romero S, Didry D, Carlier M-F, Sher A, Soldati-Favre D. 2008.  
970 *Toxoplasma* profilin is essential for host cell invasion and TLR11-dependent induction of an  
971 interleukin-12 response. *Cell Host Microbe* 3:77–87.
- 972
